# Supplementary material
Source: publisher figshare collection journal article supplement (https://geolsoc.figshare.com/ndownloader/files/5666466)
Supplement: Supplementary file 1 [file 5666466]

## Sheet: paleicpolyrev16t.txt
number	XCoord*	YCoord*	quality**	deposits†	folparallel ß	relheight ø	Shape_Area	MIN Elev (m)	MAX Elev(m)	Relief(m)	MEAN Elev (m)	STD (m)	Comments
0	607183	7.71497e+06	1	1	0	0	9395.23	659	773	114	726.062	25.081	ridge
1	607495	7.71554e+06	1	0	0	1	1935.49	543	549	6	546.5	2.29129	ridge
2	606861	7.71556e+06	1	0	0	0	6027.39	701	818	117	751.214	39.432	ridge
3	605671	7.71698e+06	1	1	0	0	317313	567	762	195	653.975	39.9223
4	606171	7.71797e+06	1	1	0	0	5593.38	592	602	10	597.5	3	ridge
5	604836	7.71284e+06	1	0	0	1	2214.11	598	604	6	601	2.12132	ridge
6	605503	7.71177e+06	2	0	0	0	2747.54	849	881	32	862.333	13.5974	ridge
7	607191	7.71143e+06	2	1	0	1	25338.8	619	919	300	688.03	90.7001	ridge
8	608398	7.71092e+06	1	1	0	0	144157	564	674	110	624.623	20.4213
9	603311	7.71064e+06	1	1	0	0	58362.6	581	655	74	616.269	16.566
10	623285	7.69e+06	2	1	0	0	317445	892	1000	108	937.98	23.04
11	622780	7.68819e+06	2	1	0	0	4520.55	920	922	2	921.571	0.728431
12	600561	7.70585e+06	1	1	0	0	148384	728	843	115	775.348	28.0696
13	598034	7.70726e+06	1	1	0	0	26251.7	612	700	88	648.756	27.9292	ridge
14	597490	7.70864e+06	1	0	0	0	27548.6	672	862	190	765.939	68.3184	ridge
15	596622	7.70867e+06	1	1	0	0	26963.3	728	771	43	743.915	11.9232	ridge
16	595743	7.71014e+06	1	1	0	0	7609.61	702	779	77	745.133	26.3056
17	597119	7.72264e+06	2	1	0	2	4167.29	346	366	20	357.286	6.29545	ridge
18	604106	7.72138e+06	1	1	0	0	20954.4	607	643	36	624.939	9.78539	ridge
20	603284	7.70608e+06	1	1	0	0	9026.22	742	763	21	753.286	6.82881	ridge
21	603694	7.70735e+06	1	1	0	0	8724.64	941	983	42	967.385	12.9647
22	605515	7.70567e+06	2	0	0	0	41405.4	634	764	130	713.908	37.8388
23	601818	7.70277e+06	1	1	0	0	161833	730	911	181	815.379	42.6967
24	598888	7.70394e+06	1	1	0	6	75997.4	686	863	177	743.721	49.7075	2 levels 850 m and 720m paleovalley
25	595537	7.70317e+06	1	1	0	6	86625.2	592	740	148	642.174	38.7758	2 levels, paired with opp ridge #26, paleovalley
26	597326	7.70286e+06	1	1	0	6	18485.6	629	721	92	670.767	25.1617	2 or more levels paired with 25
28	584783	7.70013e+06	1	1	0	0	4111.3	641	672	31	659	11.299
30	584635	7.69225e+06	1	1	0	0	42009.7	596	657	61	637.843	17.2151
31	582582	7.68887e+06	1	1	0	0	12734.7	645	656	11	649.81	3.20147
32	581608	7.68815e+06	1	1	0	0	3911.92	525	540	15	532.8	5.56417
33	577180	7.69658e+06	1	1	0	2	12563.3	404	478	74	432.348	19.1711
34	586180	7.68606e+06	1	1	0	6	98132.2	569	650	81	619.741	18.3996	with 35-41 long sloping ridge
35	587354	7.68704e+06	1	1	0	6	91227.5	640	725	85	672.089	20.4838	with 35-41 long sloping ridge
36	589338	7.68783e+06	1	1	0	0	142407	782	850	68	820.183	14.1659	with 35-41
37	590073	7.68779e+06	1	0	0	0	11553.4	789	806	17	798.333	4.79583	with 35-41
38	590874	7.68763e+06	1	1	0	6	25997.1	824	845	21	837.548	5.4476	with 35-41
39	591552	7.68717e+06	1	0	0	6	19145.4	765	794	29	777.613	8.11083	with 35-41
40	592056	7.68661e+06	1	1	0	6	33234.7	790	840	50	812.849	15.4069	with 35-41 long sloping ridge
41	594053	7.69074e+06	1	1	0	0	13262.9	747	761	14	754.95	4.39858
42	594506	7.68995e+06	1	1	0	0	57322.2	840	883	43	862.207	12.6719
43	596089	7.68739e+06	1	1	0	6	115317	716	875	159	798.728	40.9859	poss 2 levels or paleovalley
44	596904	7.68475e+06	2	1	0	1	196516	398	803	405	603.61	116.544	gentle slope into valley, thin deposits
45	587416	7.68221e+06	1	1	0	0	27020.5	719	749	30	731.205	8.14521
46	579004	7.67929e+06	1	1	0	1	56441.2	479	557	78	513.944	19.4863
47	578635	7.67807e+06	2	0	0	1	53662.9	388	467	79	425.58	18.822
48	580722	7.67903e+06	1	1	0	1	44460.6	406	506	100	464.205	19.0823
49	583780	7.67919e+06	1	1	0	0	5189.96	799	805	6	802.714	1.74964
50	584982	7.67427e+06	1	1	0	1	13966	776	816	40	788.273	9.45891	level below #304
51	585789	7.66786e+06	1	1	0	0	80952.3	768	882	114	827.531	23.5119
52	585121	7.66729e+06	1	1	0	1	42474.4	659	687	28	668.273	6.31147	pair with 53
53	584453	7.66604e+06	1	0	0	1	21839.9	625	689	64	663.079	16.8138	pair with 52, thin deposits
54	579213	7.66819e+06	1	1	0	0	109936	540	808	268	708.017	74.2341
55	579057	7.66683e+06	1	1	0	1	39810.8	427	587	160	489.508	40.0081
56	578884	7.66529e+06	2	0	0	2	15421.8	358	390	32	376.85	9.31276
57	578720	7.66599e+06	2	0	0	2	7339.99	339	364	25	351.1	8.49058
58	576470	7.66588e+06	1	1	0	0	27815.8	704	838	134	764.978	38.2614
59	574976	7.66451e+06	1	1	0	0	9121.88	697	711	14	701.071	3.36928
60	572875	7.66819e+06	1	1	0	1	226245	518	546	28	538.476	5.24968
61	601082	7.69535e+06	2	0	0	0	966613	610	729	119	681.455	26.3489	poss S block of 2 S dipping surfs offset
62	603299	7.69587e+06	2	0	0	0	24851.1	592	606	14	600.175	2.81858	61-64 together
63	605048	7.6954e+06	2	0	0	0	413281	605	667	62	634.893	11.7175	61-64 together
64	607376	7.69468e+06	2	0	0	0	1.26733e+06	421	613	192	498.515	45.6255	61-64 together
65	606547	7.70006e+06	1	1	0	0	90092.9	730	769	39	741.503	10.6104	65-70 N block
66	604591	7.69887e+06	2	0	0	1	61624.2	559	611	52	571.495	11.4136	65-70 N block
67	607907	7.69961e+06	2	0	0	1	47813.2	623	675	52	658.12	11.6539	65-70 N block
68	602629	7.70032e+06	2	0	0	1	11474.2	799	802	3	801.111	0.993807	65-70 N block
69	603143	7.70005e+06	2	0	0	0	4626.87	944	946	2	945.286	0.88063	65-70 N block
70	600771	7.69911e+06	2	0	0	0	479028	742	912	170	826.024	41.3698	65-70 N block
71	614417	7.66772e+06	1	1	0	0	74973.3	974	1071	97	1024.04	20.7681
72	619573	7.66377e+06	2	1	1	0	428719	882	1028	146	985.625	33.8769
73	623706	7.66264e+06	1	1	0	0	241616	963	1032	69	1005.66	17.9191
74	624504	7.65887e+06	1	1	0	0	257451	972	1067	95	1017.91	21.7696
75	625530	7.65798e+06	1	1	0	0	66851.6	1053	1107	54	1077.87	16.2337
76	627296	7.65684e+06	1	1	0	0	113407	1108	1214	106	1182.3	32.038
77	645248	7.65318e+06	1	1	0	1	68980.9	1213	1267	54	1242.56	14.2424	highest flat but below ridges
78	644460	7.64989e+06	1	1	0	1	290981	927	1100	173	1035.69	41.3333
79	644103	7.64143e+06	1	1	0	0	134108	1129	1208	79	1173.87	22.9115	correl with 80
80	647210	7.63787e+06	1	1	0	0	666735	1129	1309	180	1219.42	54.8698	correl with 79
81	647346	7.64275e+06	1	1	0	0	312484	971	1254	283	1087.96	65.0994	correl with 79,80
82	648256	7.64553e+06	1	1	0	0	30123.9	1419	1469	50	1445.83	14.522
83	649351	7.64933e+06	1	1	0	1	356018	1175	1330	155	1262.6	33.8428	low angle to fol correl with 84,lower than 82
84	650867	7.64624e+06	1	1	0	1	46256.8	1273	1384	111	1308.1	30.6564	low angle to fol correl with 83
85	650374	7.64475e+06	1	1	0	0	107146	1459	1511	52	1490.35	12.8956	low angle to fol
86	650921	7.64237e+06	1	1	0	0	385760	1188	1442	254	1327.41	63.5963
87	655058	7.64145e+06	1	1	0	0	2.14347e+06	1241	1530	289	1385.43	70.0011	rolling but cts
88	650649	7.63872e+06	1	1	0	0	682540	1097	1332	235	1268.94	55.638
89	654133	7.634e+06	1	1	1	1	1.57688e+06	1077	1259	182	1175.05	40.2572	part of same paleolow as 308?
90	658996	7.63308e+06	1	1	1	1	785340	1102	1234	132	1194.37	40.1213
91	662621	7.63243e+06	1	1	1	1	299234	1040	1145	105	1121.93	26.9412
92	661422	7.63784e+06	1	1	1	0	637321	1370	1508	138	1456.37	34.1902
93	659905	7.64186e+06	1	1	0	0	941978	1185	1328	143	1270.91	39.7954
94	657608	7.63822e+06	1	1	0	0	1.09079e+06	1316	1481	165	1414.87	38.823
95	665224	7.63735e+06	1	1	0	0	1.38707e+06	1414	1671	257	1533.67	55.7927
96	667696	7.63703e+06	1	1	1	0	493753	1559	1626	67	1597.11	18.8427
97	660931	7.6541e+06	1	1	0	0	162125	1404	1486	82	1459.01	21.3992
98	661947	7.65316e+06	1	1	0	0	381917	1372	1484	112	1414.98	24.1942
99	663606	7.65256e+06	1	1	0	0	76313.8	1222	1335	113	1268.08	24.8568
100	665603	7.65324e+06	1	1	1	0	705451	1280	1424	144	1368.09	27.9921
101	669454	7.65076e+06	1	1	1	1	87519.8	1139	1227	88	1180.54	26.8791
102	670492	7.64709e+06	1	1	0	0	2.52045e+06	1228	1487	259	1378.16	65.4999	vlow angle to fol
103	674782	7.64727e+06	1	1	0	1	467871	1199	1296	97	1235.95	23.2293	may have edge of valley wall, inset to 310
104	676514	7.64616e+06	1	1	0	1	430539	1259	1340	81	1298.98	23.1862
105	679950	7.64385e+06	1	1	0	1	674998	1094	1348	254	1249.08	59.6145
106	678258	7.64296e+06	1	1	0	1	912204	1250	1352	102	1307.8	20.2286
107	678091	7.64477e+06	1	1	0	1	370368	1272	1365	93	1324.76	23.6493
108	679171	7.64208e+06	1	1	0	1	402614	1058	1316	258	1213.19	57.1796
109	675869	7.61193e+06	1	1	0	0	195502	1416	1554	138	1523.87	33.7528
110	677399	7.61094e+06	1	1	0	0	80810.7	1592	1654	62	1625.71	21.3162
111	576379	7.6286e+06	1	1	0	0	105625	848	921	73	887.759	16.4626	low angle to fol
112	606962	7.63993e+06	1	1	0	0	102294	1085	1201	116	1124.66	28.4556
113	607991	7.63662e+06	1	1	0	0	47071.1	1180	1195	15	1186.91	3.81287
114	608402	7.63752e+06	1	1	0	0	169565	983	1105	122	1031.26	32.889
115	610550	7.63854e+06	1	1	0	0	379332	917	1013	96	980.35	24.9603
116	600054	7.63115e+06	1	1	0	0	51156	1053	1085	32	1065.22	8.49106
117	630453	7.68635e+06	1	0	0	1	208208	806	878	72	833.887	16.6763
118	635631	7.68977e+06	1	1	0	1	238245	763	915	152	860.107	38.0478
119	636045	7.69148e+06	1	0	0	0	14093.9	1156	1184	28	1168.38	9.11872
120	635969	7.69237e+06	1	1	0	1	237441	922	1023	101	968.562	18.4518
121	634608	7.69327e+06	1	1	0	0	136593	761	1010	249	860.824	72.3326
122	634485	7.69533e+06	1	1	0	0	161168	901	1022	121	961.715	30.5406
123	634206	7.69579e+06	1	1	0	0	28876.9	927	960	33	948.311	8.85142
124	649012	7.68412e+06	1	1	0	0	78944.2	1308	1327	19	1319.83	3.69631
125	648193	7.68412e+06	1	1	0	0	99445.1	1162	1244	82	1211.75	20.2207
126	650262	7.68464e+06	1	1	1	1	41211.7	958	1013	55	980.746	12.5488
127	674666	7.67675e+06	1	1	1	0	216552	1072	1297	225	1203.41	46.461
128	676854	7.67993e+06	1	1	0	1	205830	1131	1227	96	1184.4	26.4463
129	679828	7.68122e+06	1	1	1	1	326982	1208	1273	65	1240.99	16.8188	inset into or cts dipslope with 326
130	680536	7.68226e+06	1	1	1	1	539402	1125	1211	86	1179.54	16.307	inset into or cts dipslope with 326 and 129
131	684633	7.67826e+06	1	1	0	1	66317.8	1097	1170	73	1115.55	21.0407
132	684332	7.68005e+06	1	1	0	1	107627	1063	1170	107	1128.32	30.5054
133	688779	7.6795e+06	1	1	0	1	265822	1174	1246	72	1227.17	17.308
134	686528	7.68662e+06	1	1	0	1	445765	947	1134	187	1035.36	41.0381
135	683702	7.67533e+06	1	1	0	0	402531	1103	1438	335	1271.42	75.4814
136	683857	7.6772e+06	1	1	0	0	16890.7	1270	1289	19	1278.56	5.35643
137	678716	7.67279e+06	1	1	0	0	128630	1248	1352	104	1319.31	27.2954
138	682060	7.66617e+06	1	1	0	1	19076.2	1205	1262	57	1248.36	17.845	low angle to fol
139	683721	7.66566e+06	1	0	0	1	763476	1197	1356	159	1265.91	35.8275	low angle to fol, incised into 810
140	688115	7.66782e+06	1	1	0	0	278723	1219	1400	181	1313.76	46.6139
141	689387	7.6672e+06	2	1	1	0	90139.8	1217	1425	208	1331.36	72.908
142	690647	7.66266e+06	1	1	0	1	530635	1108	1186	78	1158.99	19.8393
143	689368	7.66436e+06	1	1	0	1	739081	1036	1276	240	1180.47	72.9853
144	692467	7.66798e+06	1	1	0	0	16341.7	1292	1307	15	1302.04	3.47991
145	692738	7.66693e+06	1	1	0	1	39541.7	1238	1262	24	1248.35	8.1816
146	694621	7.66897e+06	1	1	0	0	8922.08	1356	1364	8	1360.5	2.02661
147	694668	7.67228e+06	1	1	0	0	952142	1234	1402	168	1345.91	36.3117	low angle to fol
148	696683	7.67413e+06	1	1	0	0	592283	1258	1571	313	1396.68	83.9597
149	698578	7.67486e+06	1	1	0	0	493060	1150	1465	315	1292.36	79.1126
150	700503	7.67385e+06	1	1	0	1	303872	1097	1145	48	1124.52	12.7549	inset into 149
151	700627	7.66991e+06	1	0	0	0	930759	1234	1423	189	1351.11	42.2467
152	699352	7.66926e+06	2	1	0	2	81354.1	1117	1196	79	1145.59	19.5498	paleovalley on ridgeline
153	697607	7.66862e+06	1	1	0	1	1.02983e+06	1209	1389	180	1314.71	38.4734	poss 2 levels, low angle fol
154	701318	7.66756e+06	1	1	1	1	310263	1206	1306	100	1260.14	23.3734
155	701114	7.66444e+06	1	1	1	0	504066	1333	1470	137	1430.8	30.2731	bench 40m lower not outlined; rolling fluvial topo
156	700152	7.66223e+06	1	1	0	0	163638	1399	1441	42	1411.39	10.6344	2 levels 40m apart
157	704765	7.66347e+06	1	1	0	0	326107	1435	1522	87	1475.4	20.5538
158	705764	7.66207e+06	1	1	0	0	238853	1347	1403	56	1378.36	14.7993
159	706698	7.66053e+06	1	1	0	0	244169	1412	1483	71	1465.01	14.9379
160	707431	7.65988e+06	1	1	0	0	81281.9	1392	1475	83	1428.86	22.0637
161	707086	7.65856e+06	1	1	0	0	1.47539e+06	1294	1498	204	1411.39	42.7671	smooth slopingtopo, no sharp elevation breaks
162	691262	7.6536e+06	1	1	0	0	853028	1121	1306	185	1232.79	37.4781	low angle to fol, paleovalley in middle
163	694397	7.65358e+06	1	1	1	0	685218	1299	1502	203	1425.66	40.3936	connected to 164 by smooth slope
164	694819	7.65478e+06	1	1	1	0	518381	1161	1364	203	1240.61	65.2542
165	615378	7.65558e+06	1	1	0	0	377724	914	1115	201	1013.61	58.3772	paleovalley 80m lower than sides
166	633497	7.64784e+06	1	1	0	0	30600.8	1174	1223	49	1198.28	16.4463
167	552780	7.65233e+06	1	1	0	0	253903	729	845	116	784.024	25.8411
168	557669	7.64876e+06	1	1	0	6	804081	533	802	269	671.203	72.342	prob 2 levels but no sharp break
169	560620	7.64802e+06	1	1	0	0	57567.9	805	843	38	829.26	9.80672
170	561270	7.64739e+06	1	1	0	0	18600.5	821	841	20	834.258	7.03891
171	561950	7.64683e+06	1	1	0	0	38426	917	980	63	943.484	18.6865
172	555491	7.6464e+06	1	1	0	1	377839	509	776	267	593.529	56.5789	correlative with 168
173	551084	7.643e+06	1	1	0	1	91485.5	480	534	54	508.662	11.1425
174	545509	7.6212e+06	1	1	0	0	492093	742	910	168	829.72	32.331
175	653507	7.6134e+06	2	1	1	1	232107	1123	1270	147	1227.92	37.0272
176	654123	7.61498e+06	2	1	1	1	725126	1115	1246	131	1167.42	35.7076
177	653490	7.61144e+06	1	1	0	0	484754	1251	1434	183	1344.25	63.385
178	650336	7.6135e+06	1	1	1	0	1.25395e+06	1366	1525	159	1447.57	36.0559
179	647992	7.61499e+06	1	1	1	0	266354	1413	1563	150	1488.07	37.1497
180	648715	7.61653e+06	1	1	1	0	509998	1316	1396	80	1354.87	16.6319
181	642871	7.61711e+06	1	1	0	0	686939	1313	1383	70	1358.41	15.1692
182	641444	7.61513e+06	1	1	0	0	1.29747e+06	1310	1424	114	1385.83	24.0754	sloping topo is fol parallel in S
183	641754	7.61345e+06	1	1	0	0	779938	1326	1408	82	1376.62	15.5278	sloping topo is fol parallel in S
184	640282	7.62232e+06	1	1	1	0	252458	1338	1465	127	1429.79	31.3946
185	640941	7.62346e+06	1	1	1	0	477475	1345	1429	84	1403.69	20.5057
186	638759	7.61993e+06	1	1	0	0	426598	1276	1347	71	1320.93	16.7398
187	636287	7.62109e+06	1	1	0	0	371819	1366	1444	78	1407.44	18.5662
188	634503	7.62342e+06	2	0	0	0	141763	1460	1511	51	1480.41	9.3201
189	637132	7.62272e+06	2	1	0	1	30232.5	1210	1243	33	1229.38	8.51133
190	638317	7.62293e+06	1	1	0	0	58933.8	1365	1415	50	1395.61	11.8587
191	638151	7.62697e+06	1	1	0	0	625655	1293	1454	161	1415.68	37.4521
192	636446	7.62738e+06	1	1	0	0	461425	1286	1475	189	1400.62	61.6268
193	633563	7.6278e+06	2	1	1	0	777226	1232	1427	195	1322.62	46.8325	slope due to fol
194	640071	7.62877e+06	1	1	0	0	697873	1252	1391	139	1336.91	32.5755
195	636770	7.63092e+06	2	1	1	0	792969	1204	1342	138	1299.91	28.704	slope due to fol
196	633811	7.63264e+06	1	1	0	0	227311	1133	1303	170	1225.12	60.8189
197	639061	7.63277e+06	1	1	0	0	354573	1215	1264	49	1243.18	9.60254
198	692255	7.68431e+06	1	1	0	1	113014	1238	1290	52	1265.56	14.1529
199	692575	7.68321e+06	1	1	0	0	200456	1369	1470	101	1416.71	27.2326
200	693936	7.68764e+06	1	1	0	1	53852.5	1143	1225	82	1191.21	22.5528
201	695581	7.67871e+06	1	1	0	0	266975	1317	1384	67	1356.73	19.77
202	694570	7.67657e+06	1	1	1	6	185045	1330	1504	174	1431.8	54.6629	2 levels in 100m paleovalley
203	692841	7.67634e+06	2	1	1	6	448857	1254	1428	174	1352.45	61.1514	slope due to fol dip
204	691915	7.67677e+06	1	1	1	0	232564	1310	1366	56	1350.9	15.7956
205	690258	7.67354e+06	1	1	0	0	78644.9	1301	1341	40	1324.31	12.3777
206	691567	7.67447e+06	1	1	0	0	198061	1222	1386	164	1344.21	36.8654
207	673451	7.62928e+06	1	1	0	0	626816	1298	1370	72	1330.98	17.4649	low angle to fol
208	675218	7.62811e+06	1	1	0	0	139718	1289	1334	45	1309.68	12.3775	low angle to fol
209	676352	7.62616e+06	1	1	0	0	456386	1336	1395	59	1372.91	11.8942	low angle to fol
210	677729	7.62586e+06	1	1	0	0	816516	1231	1314	83	1286.83	18.4579	low angle to fol
211	673833	7.62727e+06	1	1	0	0	379467	1289	1341	52	1320.73	11.056	low angle to fol
212	682607	7.63194e+06	1	1	0	0	188072	1593	1637	44	1614.62	14.3207
213	680941	7.63447e+06	2	1	1	0	59679	1474	1539	65	1517.83	13.4217	might be inset or controlled by fol
214	686389	7.62413e+06	2	0	0	1	403195	898	995	97	938.714	19.6784
215	684790	7.62464e+06	2	0	0	1	222854	938	987	49	966.915	12.9536
216	687725	7.6279e+06	2	1	0	1	191178	982	1011	29	1001.45	5.96749
217	689452	7.62847e+06	2	0	0	1	169985	963	996	33	984.442	7.76469
218	661015	7.61613e+06	1	1	0	1	152457	1283	1336	53	1318.76	10.6494
219	662903	7.61645e+06	1	1	0	1	243113	1258	1305	47	1283.78	13.5254
220	700880	7.62914e+06	1	1	0	0	52405	1296	1423	127	1373.2	41.5009
221	697614	7.62881e+06	1	1	0	1	355879	1148	1264	116	1236.76	23.6664
222	694666	7.63609e+06	1	1	0	2	400987	1008	1089	81	1054.09	22.5275
223	694117	7.6373e+06	1	1	0	2	129061	1021	1043	22	1031.15	5.08631
224	682181	7.63911e+06	1	1	0	1	416533	1098	1165	67	1139.64	9.97864
225	684166	7.63868e+06	1	1	0	1	530041	1126	1266	140	1193.11	33.6483
226	687638	7.63501e+06	1	1	1	3	50417.3	1041	1119	78	1079.54	19.6571
227	686042	7.63414e+06	1	1	1	2	127100	1199	1306	107	1240.25	27.2422
228	686394	7.6323e+06	1	1	1	1	154360	1345	1468	123	1410.83	36.1229
229	684762	7.64936e+06	1	0	0	3	1.77599e+06	759	846	87	799.024	19.1829	low angle to fol, inset terrace
230	683634	7.6523e+06	1	0	0	3	803205	716	783	67	762.122	13.3642	low angle to fol, inset terrace
231	671346	7.65418e+06	1	1	0	0	382900	1209	1353	144	1284.35	33.6777
232	678701	7.67152e+06	1	1	0	0	83676.4	1247	1276	29	1261.08	5.84849
233	683068	7.68977e+06	1	1	1	2	59145.2	872	893	21	882.957	5.19287	inset to 371
234	665053	7.69576e+06	1	1	0	1	77351.6	908	1023	115	970.226	29.5042
235	657039	7.69866e+06	2	0	0	2	564651	756	827	71	797.037	19.5799
236	649277	7.70535e+06	1	1	0	1	253400	895	998	103	935.43	22.2283	possibly inset into 237
237	649544	7.70456e+06	1	1	0	1	11963.8	1003	1007	4	1005.5	1.07238
238	647114	7.71111e+06	1	1	0	2	209525	784	897	113	838.399	26.6765
239	637897	7.71333e+06	1	1	0	1	39027.6	776	800	24	782.6	4.63366
240	644673	7.70815e+06	1	1	0	2	247844	712	824	112	788.924	29.1949
241	646984	7.7145e+06	2	0	0	2	101964	869	907	38	896.188	10.3582
242	644811	7.71459e+06	1	0	0	1	4794.62	1075	1084	9	1080.43	3.15582
243	645439	7.71582e+06	2	0	0	1	18573.6	870	912	42	890.897	10.5482
244	637252	7.71297e+06	1	1	0	0	8395.09	942	969	27	954.562	8.47768
245	638791	7.71181e+06	1	1	0	0	39104.6	1006	1046	40	1034.35	11.4256
246	639899	7.71256e+06	1	1	0	2	11865.8	797	815	18	805.056	5.32783
247	636841	7.71422e+06	1	1	1	1	130323	754	892	138	788.798	30.2815
248	639287	7.72367e+06	1	0	0	3	121066	476	511	35	498.469	8.99821	inset into 249 by >100m
249	637876	7.72408e+06	2	0	0	2	55135.6	508	682	174	606.466	50.3822
250	637892	7.72185e+06	1	0	0	3	520288	477	597	120	539.088	24.8827
251	636129	7.72123e+06	2	1	0	2	26156.1	686	707	21	702.381	3.83562
252	639665	7.7262e+06	2	1	0	2	493008	445	603	158	528.468	38.3971	inset into 373 or tilted?
253	634039	7.7233e+06	1	1	0	0	358998	702	940	238	801.657	60.3611	rolling topo
254	631604	7.72475e+06	1	1	0	1	43850.9	660	781	121	732.493	42.4645
255	633445	7.72398e+06	2	0	0	1	123690	710	824	114	759.77	36.8143	in between 2 hts, inset into 253
256	629658	7.72364e+06	2	0	0	2	125464	608	685	77	662.926	20.1827	in between 1 and 2 hts
257	630989	7.72562e+06	1	0	0	2	54173.5	564	620	56	599.843	18.4012	inset into 254
258	634303	7.72717e+06	1	1	0	0	73112.8	748	917	169	863.974	44.7139	rolling topo ~50m relief
259	634885	7.72588e+06	1	1	0	0	15793	856	890	34	877.731	9.28008
260	627211	7.73e+06	1	1	0	1	8214.61	685	697	12	690.857	3.58284
261	627575	7.72899e+06	1	1	0	1	6262.13	879	887	8	884	2.3094
262	618506	7.73958e+06	1	1	0	3	216262	238	480	242	378.123	62.2378	well known tilted surface Haja
263	633075	7.74279e+06	1	1	0	2	74879.2	656	739	83	714.198	20.223	poss intermediate glacial bench
264	636811	7.72955e+06	2	1	0	0	127919	710	783	73	744.436	18.6435
265	638330	7.73e+06	2	0	0	0	247077	662	765	103	730.64	23.6555
266	639089	7.73078e+06	1	1	0	0	75383.2	746	812	66	784.422	11.9771
267	640426	7.72998e+06	1	1	0	0	248831	742	841	99	800.482	19.755
268	617518	7.71303e+06	3	0	0	3	1.16914e+06	62	292	230	240.543	46.3191	rolling, low surface
269	615390	7.71296e+06	3	0	0	3	79499	294	335	41	324.648	9.14003	rolling, low surface
270	614758	7.71261e+06	3	0	0	3	110542	260	336	76	301.676	21.4926	rolling, low surface
271	614625	7.71147e+06	3	0	0	3	56047.4	260	278	18	268.467	4.24055	rolling, low surface
272	614607	7.71006e+06	3	0	0	3	409549	305	340	35	325.948	7.02899	rolling, low surface
273	611232	7.71687e+06	3	0	0	2	176979	469	729	260	540.989	47.7879	ridge
274	606807	7.69923e+06	2	0	0	2	97043.9	613	719	106	660.09	29.1722
275	626589	7.67772e+06	3	0	0	3	461046	463	535	72	501.135	20.4435
276	627072	7.67667e+06	3	0	0	3	332599	373	477	104	415.376	25.9589	inset into 275 <100m
277	629003	7.67531e+06	3	0	0	3	446006	445	480	35	464.672	9.14323
278	622956	7.66636e+06	2	1	0	1	57113.3	852	870	18	862.074	3.65897	inset into 279
279	623408	7.66539e+06	2	1	0	0	163622	773	883	110	822.561	30.7318	faulted down from 281?
280	622520	7.66686e+06	2	0	0	1	94695.2	714	792	78	762.464	19.9193	inset into 280,281
281	624482	7.66445e+06	2	1	0	0	206811	918	987	69	961.607	14.2553	low angle to fol
282	616857	7.65454e+06	2	0	0	1	367048	932	1027	95	973.895	21.7477	inset into 165 by <100m
283	618413	7.65323e+06	3	0	0	1	89552.5	853	928	75	884.708	18.3291	inset into 166 by <100m
284	620223	7.65856e+06	3	0	0	0	335585	806	1018	212	918.212	66.0928
285	621241	7.65675e+06	3	0	0	1	191288	723	798	75	760.768	24.6495	inset into 284
286	625744	7.6548e+06	2	0	0	2	42827.1	777	781	4	779.426	0.974923	inset into 76
287	654921	7.62973e+06	2	0	1	0	306674	1289	1384	95	1323.84	22.8642
288	654701	7.62528e+06	2	0	1	1	404356	1019	1087	68	1060.38	18.417
289	650240	7.61872e+06	2	1	0	1	381678	1184	1286	102	1230.73	35.9631
290	646335	7.62073e+06	2	0	0	1	443436	1063	1122	59	1093.99	15.3435
291	646401	7.62382e+06	2	0	0	2	2.29298e+06	799	929	130	863.928	24.812
292	641104	7.64142e+06	3	0	0	3	350839	562	615	53	599.659	7.1329	poss flted terrace or flt in rock
293	636540	7.65194e+06	2	1	0	2	82971.9	1060	1098	38	1079.15	9.41985
294	589370	7.68242e+06	2	0	0	1	224267	558	683	125	610.121	27.5308	inset into 45 <100m
295	602969	7.69143e+06	2	0	0	1	518713	471	545	74	522.918	17.8853	inset into 61 about 100m
296	606874	7.69313e+06	2	0	0	1	24973.3	508	544	36	526.15	12.0303	inset into 63 about 100m
297	576515	7.62721e+06	2	1	1	1	1.21283e+06	608	884	276	783.313	64.7369	possibly tilted SE inset into 111 <100m
298	584408	7.62875e+06	3	0	1	3	1.88886e+06	165	780	615	409.264	125.872	possiblly tilted SE
299	581391	7.62251e+06	1	1	1	2	205016	649	731	82	690.832	17.592
300	597554	7.69033e+06	2	0	0	1	459186	438	660	222	522.469	47.1764	warped or tilted?
301	597523	7.68682e+06	2	0	0	1	274396	467	796	329	606.181	81.7327	warped or tilted?
302	597868	7.68537e+06	2	0	0	1	199535	554	740	186	632.328	41.2617	warped or tilted?
303	606708	7.71235e+06	1	1	0	1	14768.2	728	796	68	751.522	15.9042
304	585304	7.67473e+06	1	1	0	0	7396.44	827	860	33	838.909	10.2465
305	645541	7.6461e+06	2	1	0	0	86631	1179	1286	107	1226.23	31.9337	slope-paleovalley wall?
306	643337	7.6457e+06	2	0	0	3	278029	900	996	96	950.211	26.7318	pair with 307, subglacial bench?
307	644828	7.64642e+06	2	0	0	3	204337	1000	1036	36	1014.64	9.29271	pair with 306
308	659889	7.63717e+06	1	1	1	1	104579	1199	1347	148	1264.87	51.18	inset into 92 or paleovalley?
309	659616	7.63629e+06	1	0	1	1	281685	1064	1124	60	1098.35	12.9041	inset into 308
310	674903	7.64959e+06	1	1	0	0	146717	1156	1419	263	1311.13	96.1477	103 inset into this
311	680099	7.60684e+06	2	1	0	3	104307	916	943	27	927.024	6.72358
312	675934	7.60972e+06	2	1	1	1	35786.4	1215	1273	58	1233.83	15.5761	poss inset into 109-110
313	674950	7.61048e+06	2	1	1	1	41526.7	1152	1219	67	1182.45	18.0262	poss inset into 109-110
314	678667	7.60878e+06	2	1	1	1	34536.8	1203	1262	59	1233.75	14.3928	poss inset into 109-110
315	676095	7.60828e+06	2	0	0	3	79899.3	841	884	43	865.461	10.5237	poss inset into 311-314
316	677576	7.60796e+06	2	0	0	3	43225.9	857	873	16	865.197	4.03722	poss inset into 311-314
317	680758	7.60723e+06	2	0	0	3	1.86246e+06	817	863	46	839.178	7.32267	poss inset into 311-314
318	647725	7.68743e+06	2	0	0	4	308983	280	379	99	330.266	21.0125
319	650356	7.68552e+06	2	0	0	3	118854	780	826	46	800.932	8.00854	poss inset into 126
320	655754	7.68329e+06	2	1	0	1	9107.88	1005	1033	28	1019.93	8.3384
321	654417	7.68234e+06	2	1	0	0	17440	1093	1156	63	1116.93	18.0683
322	653754	7.68171e+06	2	1	0	0	20065.6	1253	1296	43	1281.39	11.0644
323	651551	7.68046e+06	2	1	0	1	11914.8	1142	1172	30	1158	8.96289
324	650884	7.68034e+06	1	1	0	2	16633.1	987	1002	15	993.679	4.75134	inset into 323
325	649937	7.68048e+06	2	1	0	2	65300.3	801	883	82	849.029	17.4593	inset into 324
326	679399	7.68001e+06	1	1	1	0	253032	1396	1482	86	1450.81	19.2327	poss cts dipslope with 129
327	696310	7.66527e+06	1	1	0	1	530638	958	1174	216	1074.07	77.0014	poss inset into 153 or cts with it
328	548902	7.6354e+06	2	1	0	0	66322.7	686	721	35	705.519	9.91685
329	548326	7.63529e+06	2	1	0	0	158620	610	648	38	627.914	8.24197
330	642805	7.61939e+06	2	1	0	1	114927	930	982	52	961.077	12.3103	inset into 181
331	689543	7.67309e+06	2	1	0	1	126876	1137	1180	43	1155.18	11.6114	inset into 206
332	678823	7.62583e+06	2	1	0	0	201190	1160	1236	76	1206.84	20.4772	inset into 210? or paleovalley wall
333	676063	7.62534e+06	2	1	1	1	81875.2	1258	1285	27	1272.42	8.606	inset into 210 but not much diff elev
334	674930	7.62544e+06	2	1	1	1	103085	1128	1164	36	1151.72	8.68867	inset into 210
335	675835	7.62342e+06	2	1	1	2	85564.7	1110	1149	39	1126.41	9.74262	inset into 210
336	674973	7.6223e+06	2	1	1	1	58588.8	1158	1201	43	1189.75	11.9734	inset into 210 but not much diff elev
337	674489	7.62193e+06	2	1	1	2	149698	1078	1139	61	1104.62	14.895	inset into 210
338	680090	7.63288e+06	1	1	1	0	80344.2	1628	1662	34	1646.72	7.71385
339	681319	7.63305e+06	1	1	1	0	57002.8	1676	1707	31	1698.74	7.46403
340	679322	7.63211e+06	1	1	1	0	152052	1479	1585	106	1537.98	28.9313
341	677830	7.62784e+06	2	0	0	3	208448	767	803	36	788.107	7.77829	terrace
342	681659	7.62899e+06	2	0	0	3	195706	829	861	32	844.872	5.90004	terrace above 341
343	682207	7.62844e+06	2	0	0	3	53044.5	738	788	50	766.619	14.7001	terrace equiv to 341
344	674231	7.63647e+06	1	1	0	0	152742	1069	1182	113	1129.99	33.3229
345	674819	7.63655e+06	2	0	0	1	182097	1014	1050	36	1032.38	8.23725	inset into 344
346	702940	7.64824e+06	2	1	1	0	800929	1050	1124	74	1088.45	15.6702	correl with surface level 2 to NW
347	698765	7.65291e+06	2	1	0	1	190000	1137	1222	85	1190.3	16.7369
348	698023	7.65007e+06	2	1	0	2	798815	1012	1096	84	1058.47	21.6832
349	695140	7.65214e+06	2	1	1	2	785647	1011	1105	94	1067.83	14.8092
350	697260	7.65958e+06	2	1	0	2	282617	906	984	78	951.863	18.5094
351	699108	7.66129e+06	2	0	0	1	115484	1124	1154	30	1139.46	5.8531
352	699690	7.66146e+06	2	0	0	1	85985.8	1096	1110	14	1099.58	2.78271
353	700419	7.6605e+06	2	0	0	1	176416	1197	1220	23	1209.7	6.95783
354	702022	7.65825e+06	2	0	0	1	115520	1104	1143	39	1134.58	7.68886
355	698530	7.65783e+06	2	0	0	3	147133	839	900	61	870.89	15.5622
356	705500	7.6494e+06	2	1	0	0	803514	973	1010	37	992.583	8.33648	correl with surface level 2 to NW
357	706164	7.64996e+06	2	1	0	1	330108	929	993	64	969.834	13.6886	poss inset into 356, "
358	710364	7.64588e+06	2	1	0	1	340252	1045	1102	57	1084.16	11.7232	correl with surface level 2 to NW
359	711151	7.6438e+06	2	1	0	1	1.86746e+06	840	983	143	906.263	43.7596	rolling topo low angle fol poss inset into 358 ""
360	708111	7.64625e+06	2	1	0	1	5.57946e+06	946	1081	135	1019.41	28.9791	rolling topo,"
361	707892	7.64392e+06	2	1	0	0	386160	898	971	73	932.82	19.1258	correl with surface level 2 to NW
362	706775	7.64023e+06	1	1	0	0	263077	1009	1085	76	1043.35	23.7852	low but highest in massif, poss lvl2 equiv
363	704966	7.63353e+06	1	1	1	0	295700	988	1058	70	1030.18	17.4925	low but highest in massif, poss lvl2 equiv
364	701095	7.63267e+06	1	1	1	1	108367	1126	1148	22	1140.79	3.44007	rel ht not sure 1 or 2?
365	702065	7.63256e+06	2	1	1	2	44144.9	938	963	25	955.775	5.06353	inset into 364, fol parallel
366	708510	7.63616e+06	2	1	0	1	1.7719e+06	1025	1136	111	1091.81	26.0828	rolling, "
367	710796	7.63818e+06	2	1	1	0	265233	987	1025	38	1011.49	8.18578	low but highest in massif, poss lvl2 equiv
368	712224	7.63939e+06	1	1	1	0	145988	976	1006	30	989.14	6.84365	low but highest in massif, poss lvl2 equiv
369	712429	7.63609e+06	2	1	0	0	424004	924	1002	78	957.121	17.7423	low but highest in massif, poss lvl2 equiv
370	670576	7.65494e+06	2	1	1	2	58400.1	1019	1089	70	1052.86	21.3393
371	680600	7.69142e+06	1	0	1	1	185704	869	1063	194	978.843	55.2219
372	635953	7.72234e+06	1	1	0	1	4650.88	861	865	4	863.75	1.29904
373	637310	7.7267e+06	1	1	0	0	122622	741	823	82	792.487	21.5824
374	540565	7.61529e+06	1	1	0	0	1.21981e+06	756	902	146	840.477	33.4975
375	409350	7.52636e+06	1	1	1	0	257776	506	598	92	551.155	19.1988	Trulssen 2008 A1
376	410202	7.52813e+06	1	1	0	0	276873	390	539	149	448.951	30.6049	Trulssen A1
377	414486	7.53465e+06	1	1	0	0	86270.4	659	824	165	747.384	47.959	Trulssen A3
378	412546	7.53557e+06	2	0	0	0	119347	680	932	252	796.485	67.4646	trulssen A not labelled
379	416931	7.5333e+06	1	1	0	0	58998.8	222	324	102	297.83	24.1364	Trulssen A4
380	418067	7.5366e+06	1	0	0	0	174698	471	713	242	580.223	50.8603	Trulssen A5
381	428032	7.54524e+06	1	1	0	0	221579	317	485	168	397.728	39.594	Trulssen C1.1
382	428438	7.54666e+06	1	1	0	0	108619	502	680	178	602.443	49.3787	Trulssen C1.2
383	432131	7.54814e+06	1	1	0	0	562669	189	424	235	330.019	50.6253	Trulssen C2
384	430576	7.55829e+06	1	1	0	0	417339	360	672	312	464.624	87.4669	Trulssen C3 poss older than C4,but inset in ridge
385	430663	7.56134e+06	2	1	0	0	184140	256	443	187	336.246	38.5304	Trulssen C4 offset
386	430989	7.56202e+06	1	1	0	0	169467	133	276	143	193.813	27.6797	Trulssen C5 offset from C4
387	421180	7.55139e+06	1	1	0	0	112595	380	565	185	472.826	40.6503	Trulssen B1.1 lower than ridge
388	420678	7.5539e+06	1	1	0	0	45786.4	474	541	67	513.384	14.9498	Trulssen B1.2
389	420299	7.55556e+06	1	1	0	0	134073	440	543	103	483.775	23.6954	Trulssen B2.1
390	421880	7.55542e+06	1	1	0	1	235000	222	323	101	279.392	22.5524	Trulssen B2.2 lower than 2.1 but he correlates
391	496476	7.60343e+06	1	1	0	1	1.22105e+06	281	406	125	343.388	25.8551	Paasche et al 2006 Hadseloya in-situ
392	494801	7.60355e+06	1	1	0	0	140681	434	505	71	475.268	18.6152	Paasche et al 2006 Hadseloya in-situ
393	492903	7.60482e+06	1	1	0	0	42044.8	500	564	64	539.175	14.0775	Paasche et al 2006 Hadseloya in-situ
394	492966	7.60382e+06	1	1	0	0	163335	434	548	114	505.283	20.1997	Paasche et al 2006 Hadseloya in-situ
396	496223	7.60062e+06	1	1	0	1	152439	393	468	75	436.486	18.28	Paasche et al 2006 Hadseloya in-situ
397	495496	7.60056e+06	1	1	0	1	76374.3	466	514	48	489.645	13.8513	Paasche et al 2006 Hadseloya in-situ
398	489702	7.60026e+06	1	1	0	2	171492	244	307	63	284.96	12.4174	Paasche et al 2006 Hadseloya in-situ
399	488708	7.60153e+06	1	1	0	2	198267	182	261	79	220.956	19.2745	Paasche et al 2006 Hadseloya in-situ
400	490006	7.60345e+06	1	1	0	0	131774	479	564	85	535.73	14.8891	Paasche et al 2006 Hadseloya in-situ
401	488845	7.60279e+06	1	1	0	2	281976	232	297	65	266.973	16.5223	Paasche et al 2006 Hadseloya in-situ
402	491244	7.60332e+06	1	1	0	1	14193.6	379	441	62	413.739	16.8038	Paasche et al 2006 Hadseloya in-situ
403	487172	7.60627e+06	1	1	0	1	49334.8	487	549	62	513.171	15.5084	Paasche et al 2006 Hadseloya in-situ
404	492254	7.60266e+06	1	1	0	1	1.98192e+06	270	412	142	319.343	23.3678	Paasche et al 2006 Hadseloya saprolite
405	487340	7.60272e+06	1	1	0	1	148800	273	427	154	397.197	14.6551	Paasche et al 2006 Hadseloya in-situ
406	505115	7.65419e+06	1	1	0	2	408645	218	280	62	252.191	14.7368	Paasche et al 2006 Langoya in-situ
407	503919	7.6541e+06	1	1	0	1	350107	356	460	104	403.126	19.5928	Paasche et al 2006 Langoya in-situ
408	504161	7.65271e+06	1	1	0	1	50445.3	475	513	38	499.458	10.016	Paasche et al 2006 Langoya in-situ
409	502758	7.65262e+06	1	1	0	1	324345	328	445	117	394.671	20.5384	Paasche et al 2006 Langoya in-situ
410	501756	7.65132e+06	1	1	0	1	290939	375	479	104	423.22	23.9662	Paasche et al 2006 Langoya in-situ
411	504369	7.65018e+06	1	1	0	1	11246.2	386	411	25	401.889	7.73081	Langoya
412	502348	7.65059e+06	2	1	0	0	12268.2	590	628	38	608.684	10.8047	Langoya narrow ridge below peaks
413	505860	7.64155e+06	1	1	0	1	28750.1	342	393	51	367.234	17.4931
414	505923	7.64254e+06	1	1	0	1	6166.32	386	401	15	392.5	5.0448
415	508199	7.63746e+06	2	1	0	1	37588.2	479	526	47	502.517	12.0492	below highest surfs
416	509025	7.63814e+06	2	1	0	1	10210.6	542	556	14	551.312	3.17645
417	509480	7.63795e+06	1	1	0	1	143835	426	533	107	486.44	30.5446	tilted? continuous with prev 2
418	512407	7.63626e+06	1	1	0	0	51344.2	600	629	29	614.807	9.31181
419	512235	7.63531e+06	1	1	0	0	52535.9	633	643	10	639.459	2.51374
420	512048	7.63332e+06	1	1	0	1	384151	339	422	83	370.288	22.376	poss tilted E-hanging wall
421	509842	7.63107e+06	2	1	0	0	84593.6	391	509	118	438.248	42.7395	poss tilted E
422	508311	7.62932e+06	2	1	0	1	90121.2	292	337	45	313.972	10.8634	equiv to next
423	510631	7.6304e+06	2	1	0	1	274200	293	346	53	325.564	13.9333	inset into 1, higher than next
424	511536	7.63034e+06	2	1	0	1	192207	256	300	44	281.376	9.23084	inset into prior, tilted E?
425	511737	7.61912e+06	1	1	0	0	135063	551	610	59	579.032	17.3438	tilted E, continuous with 428?
426	510824	7.61885e+06	2	0	0	1	20899.9	478	487	9	481	2.26222	inset into prev
427	510555	7.61909e+06	2	0	0	1	23987.1	490	501	11	496.222	3.06514
428	513439	7.62003e+06	2	0	0	0	227169	415	457	42	438.217	7.68424	lower tilted end of 425?
429	511999	7.62273e+06	2	0	0	0	230151	376	448	72	413.319	22.7965	correl w/ 428, lower tilted end of 425?
430	512334	7.62306e+06	2	0	0	0	98216.5	436	504	68	470.814	20.4221	correl w/ 428, lower tilted end of 425?
431	476051	7.62003e+06	2	1	0	1	101283	296	381	85	346.372	16.4184	poss tilted surf
432	479350	7.6228e+06	2	0	0	0	4795.71	662	673	11	666.167	3.71558
433	481380	7.61658e+06	2	0	0	0	18109.4	406	425	19	415.31	5.39542	lower than peak,on highest ridge
434	481430	7.61596e+06	2	0	0	0	104705	375	435	60	393.923	16.9954	with 433
435	481070	7.61505e+06	2	0	0	0	27034.1	346	357	11	352.86	2.70728	with 433,434
436	496393	7.61411e+06	2	1	0	1	323360	296	521	225	384.886	77.5784	poss tilted or orig footwall slope
437	497814	7.61601e+06	2	1	0	1	263831	264	435	171	357.702	39.6689	poss tilted or orig footwall slope
438	503955	7.61956e+06	3	0	0	1	491833	296	487	191	405.239	40.4625	poss tilted or orig footwall slope w/ prev 2
439	496932	7.61026e+06	2	0	0	1	69193.7	487	533	46	512.319	12.898	poss continous with next
440	496072	7.61111e+06	2	1	0	1	152993	379	415	36	395.399	7.33404
441	518401	7.64328e+06	1	1	0	0	29922.7	624	659	35	644.244	9.97587
442	518751	7.6428e+06	2	1	0	1	170950	500	658	158	570.493	45.1836	tilted? cut into prev
443	517987	7.64408e+06	1	1	0	1	141972	430	477	47	449.868	14.5554	inset into prev
444	518829	7.64991e+06	1	1	0	0	50658.2	541	564	23	555.783	5.96182	Andoya footwall above facet
445	520333	7.65265e+06	1	1	0	0	200560	439	533	94	482.384	23.7392
446	519871	7.65125e+06	2	1	0	1	69948.5	361	372	11	368.982	2.52416	poss inset into prev
447	438033	7.55129e+06	2	1	0	1	354768	215	442	227	293.347	44.7906	SE tilted?
448	436734	7.55304e+06	2	1	0	1	18447.6	360	373	13	367.655	3.33504	inset into next <100m
449	436953	7.55346e+06	2	0	0	1	5090.33	409	428	19	421.889	6.50546
450	437172	7.55485e+06	2	0	0	2	31052	269	284	15	275.571	3.19438	inset into prev
451	437766	7.55623e+06	2	0	0	2	75699.1	272	287	15	279.636	3.07213	correl to prev
452	438096	7.56145e+06	1	1	0	1	163741	282	409	127	331.681	29.9619	fig3d Osmundsen et al 2010? SE tilt
453	439543	7.56432e+06	2	1	0	4	146309	178	218	40	198.538	9.03493	strandflat?
454	440527	7.56445e+06	2	0	0	1	11703.6	384	430	46	412.421	14.7231	SE tilted Osmundsen et al 2010?
455	442471	7.57504e+06	1	1	0	0	465100	334	643	309	496.487	89.4228	W tilted or orig footwall slope?
456	444417	7.5753e+06	1	1	0	0	56989.4	648	738	90	694.196	19.4312	correl w prev, slopes to next
457	444004	7.57605e+06	1	1	0	0	35737.1	419	504	85	458.426	22.4372	correl w prev
458	445232	7.57733e+06	1	1	0	0	9097.8	417	442	25	430	7.58947	correl w/ next and prev?
459	445776	7.57673e+06	2	1	0	0	7590.74	497	532	35	511.417	11.0337	correl w prev
460	446071	7.57576e+06	1	0	0	0	3427.43	728	736	8	732.333	2.68742	correl w/ prev 2
461	458673	7.56936e+06	1	1	0	0	23850.6	520	569	49	544.675	14.2309
462	458299	7.56778e+06	1	1	0	0	14182.9	528	538	10	534.227	2.79499	correl w/ prev
463	467825	7.57583e+06	1	1	0	1	26935.5	514	547	33	529.186	9.02517	inset into next
464	467978	7.57614e+06	1	1	0	0	1850.36	568	573	5	571	2.16025
465	480374	7.58625e+06	1	1	0	2	239859	390	428	38	411.042	10.9696	strandflat?
466	496208	7.50834e+06	1	1	0	0	40400.5	852	986	134	909.234	33.4518
467	498045	7.51142e+06	1	1	0	0	34303.9	983	1041	58	1006.18	14.3603
468	509709	7.50308e+06	2	1	1	1	42311.9	752	857	105	805.7	32.1805
469	571210	7.55566e+06	2	0	0	0	302659	1128	1269	141	1208.4	41.4206
470	602298	7.57411e+06	2	1	1	1	1.05115e+06	1229	1361	132	1321.63	21.043	rolling, subparallel foliation
471	603603	7.57193e+06	2	1	1	0	99168.5	1341	1446	105	1383.97	20.3535	correl w/ prev
472	593804	7.56695e+06	2	1	1	0	25296.2	1294	1310	16	1304.75	3.80624	highest of 3
473	594207	7.5671e+06	1	1	0	1	24313.3	1216	1283	67	1239.97	16.6417	subparallel foliation, saprolite, inset to prev
474	595015	7.56762e+06	2	1	1	2	133162	1105	1158	53	1131.07	11.6356	inset to prev lowest of 3
475	599617	7.56059e+06	1	1	0	1	12908.3	1079	1092	13	1085.61	3.51072	inset into next, saprolite
476	600384	7.56145e+06	1	1	0	0	16421.4	1421	1450	29	1437.67	7.49321
477	607372	7.57687e+06	2	0	0	2	167587	1137	1223	86	1183.96	18.8413	rolling,bare, saprolite loc wrong?
478	605193	7.57872e+06	1	1	0	2	25143.4	1217	1226	9	1220.39	1.99851	inset into next, saprolite
479	604606	7.5787e+06	1	1	0	1	52443.7	1316	1379	63	1341.76	15.8846
480	601273	7.57757e+06	1	1	0	0	58155.3	1461	1544	83	1507.23	23.421	subparallel foliation, saprolite
481	596812	7.5819e+06	1	1	0	1	72146.4	1414	1443	29	1424.01	6.49381	saprolite loc wrong? subparallel foliation, inset to next
482	597356	7.58234e+06	1	1	0	0	17154	1544	1557	13	1550.88	3.69331	subparallel foliation
483	579968	7.57769e+06	1	1	1	1	635740	1077	1342	265	1209	52.4193
484	581188	7.57813e+06	1	1	0	1	20115.8	1209	1242	33	1228.28	6.99211	inset into prev
485	586118	7.57648e+06	2	1	1	2	93428.2	994	1066	72	1027.1	22.0726	flattish bench in fol dipslope
486	586322	7.5755e+06	2	1	0	2	93820.2	1097	1141	44	1127.39	10.7038	flattish bench in dipslope
487	588172	7.57371e+06	1	1	0	1	61268.1	1293	1314	21	1305.14	4.54977	bench on dipslope
488	588389	7.57295e+06	1	1	1	0	102684	1436	1512	76	1471.01	14.726
489	590004	7.57205e+06	1	1	0	0	11568.1	1712	1726	14	1721.65	3.22916	subpar fol highest of 3 (2 prev)
490	546387	7.61359e+06	2	1	1	0	27322.8	883	956	73	909.727	15.2708	top of long dipslope
491	547315	7.61463e+06	1	1	0	0	14057.5	871	884	13	876.304	3.91691
492	545278	7.61327e+06	2	1	0	1	77767.9	663	693	30	680.444	7.2627	inset into prev,subpar fol
493	547472	7.61589e+06	2	1	0	2	33264.6	641	661	20	650.627	4.68607	inset into one up ridge
494	539360	7.62631e+06	1	1	0	1	41484	744	784	40	754.516	9.58839	rel ht ?
495	536393	7.62632e+06	1	1	0	1	143045	781	862	81	815.67	20.0345	rel ht ?
496	536227	7.62307e+06	1	1	0	0	23044.4	782	803	21	796.162	5.45999
497	536955	7.62197e+06	1	1	0	0	23770.2	767	814	47	794.316	13.4225
498	587775	7.61242e+06	2	1	1	0	17298.4	1260	1282	22	1273.52	6.73959	top of dipslope
499	578428	7.61428e+06	1	1	0	1	85656.8	928	980	52	954.314	12.6959
500	578950	7.6133e+06	1	1	0	1	5330.85	940	947	7	943	2.12132
501	578691	7.61199e+06	1	1	0	1	20655.3	979	991	12	983.323	2.80997
502	579809	7.60841e+06	1	1	0	0	19067.5	1183	1301	118	1224.69	36.8886
503	590443	7.62105e+06	1	1	0	0	15380.7	1121	1129	8	1125	2.498
504	588972	7.62162e+06	2	1	0	1	118629	918	943	25	933.242	7.2209	inset into prev, subparallel foliation
505	587928	7.62303e+06	2	1	1	1	208334	971	1004	33	988.712	6.61292
506	595218	7.6192e+06	1	1	0	0	36962.4	1104	1122	18	1117.1	4.02445
507	596636	7.61901e+06	2	1	1	1	148516	905	955	50	928.651	13.4639	inset into prev or fol par?
508	599606	7.61824e+06	1	1	0	0	65902.4	1022	1141	119	1089.31	40.4583
509	603825	7.61162e+06	1	1	0	0	54408.7	1014	1033	19	1024.91	4.24167
510	605107	7.62723e+06	1	1	0	0	27847.8	1257	1269	12	1264.26	3.0354
511	616414	7.62354e+06	1	1	0	0	23301.5	1422	1447	25	1436.58	7.29322
512	615136	7.61846e+06	1	1	0	1	16472.5	1157	1167	10	1162.35	2.58101
513	611787	7.61197e+06	1	1	0	0	4789.98	1326	1330	4	1328.38	1.11102
514	623030	7.61374e+06	1	1	0	0	72769.2	1352	1374	22	1361.05	5.0341
515	621934	7.61831e+06	1	1	0	0	10573.4	1360	1382	22	1368.67	5.73488
516	622564	7.61721e+06	1	1	0	0	10121	1357	1366	9	1361.14	2.66879	subparallel foliation
517	625610	7.60977e+06	1	1	1	0	13096.8	1443	1446	3	1445	0.9759
518	632806	7.61296e+06	2	1	1	0	331452	1277	1351	74	1316.74	21.852
519	629202	7.61228e+06	2	0	1	1	146089	1142	1187	45	1172.18	10.8719
520	637232	7.61489e+06	2	1	1	0	132099	1314	1374	60	1354.57	14.0713
521	620377	7.62666e+06	1	1	1	1	19803.5	1201	1211	10	1205.43	2.6164
522	688981	7.70905e+06	1	1	0	0	56889	1524	1563	39	1539.16	9.00033	saprolite
523	690666	7.70991e+06	1	1	0	0	187949	1558	1628	70	1603.46	19.9409
524	695886	7.70917e+06	1	1	0	0	206273	1401	1501	100	1446.59	27.5042
525	697557	7.71004e+06	1	1	0	0	255430	1419	1524	105	1477.71	30.9346
526	694796	7.71828e+06	1	1	0	0	497240	1372	1524	152	1440.93	47.997	saprolite
527	719645	7.71546e+06	1	1	0	0	499385	1183	1249	66	1223.47	14.8808
528	718634	7.71706e+06	1	1	0	0	312389	1144	1190	46	1168.82	10.6497
529	720275	7.7138e+06	1	1	0	0	135753	1169	1221	52	1195.23	16.9245
530	712296	7.71846e+06	1	1	0	1	1.72022e+06	1009	1105	96	1048.99	21.5596
531	697222	7.75844e+06	3	1	0	3	113477	572	616	44	587.522	9.1205
532	678522	7.74377e+06	1	1	1	2	243047	821	892	71	860.752	15.0275
533	678644	7.74123e+06	1	1	1	2	1.66853e+06	742	963	221	824.109	46.0701
534	678025	7.73858e+06	1	1	0	1	714482	814	1096	282	895.635	68.1192	inset? rolling, low angle to fol
535	674252	7.73742e+06	1	1	0	1	11124	1038	1051	13	1044.94	3.851
536	671540	7.74007e+06	2	1	1	2	395700	707	918	211	789.256	47.9115
537	664324	7.72838e+06	1	1	0	1	409471	858	961	103	923.442	22.1255	low angle to fol
538	668096	7.73114e+06	1	1	0	1	119694	816	854	38	830.481	9.3631	low angle to fol
539	670259	7.73295e+06	1	1	0	1	6955.65	1064	1077	13	1069.83	3.9546	rel ht?
540	680516	7.7286e+06	1	1	1	1	161403	1079	1163	84	1121.18	21.5731
541	679386	7.72394e+06	1	1	1	0	91716.3	1160	1209	49	1188.29	13.2748
542	679397	7.72536e+06	1	1	1	1	116658	1041	1095	54	1071.65	13.8226
543	674252	7.72495e+06	1	1	0	0	26325.7	1151	1163	12	1157.53	2.92393
544	674317	7.72543e+06	1	1	0	0	20146.2	1181	1209	28	1193.31	8.70143
545	640428	7.7779e+06	2	0	0	2	19891.8	404	439	35	422.367	9.85726
546	645690	7.79018e+06	2	1	0	2	161633	374	481	107	404.981	24.679
547	645763	7.78799e+06	1	1	0	1	9975.65	524	528	4	526.077	1.14095
548	657958	7.78998e+06	1	1	0	1	114875	486	564	78	518.576	23.5695
549	657252	7.79066e+06	1	1	0	1	69713.4	481	503	22	490.918	7.2289
550	673279	7.80148e+06	1	1	0	0	1.14216e+06	401	701	300	550.348	81.5467
551	674478	7.79879e+06	1	1	0	0	86651.2	660	739	79	693.574	21.4606
552	673600	7.79754e+06	1	1	0	0	22160	678	687	9	682.361	1.75044
553	697071	7.80224e+06	1	1	0	0	231867	704	745	41	724.543	8.65884
554	665854	7.7621e+06	2	1	0	1	141149	762	796	34	777.52	8.13775	inset into next
555	666712	7.76081e+06	1	1	0	0	12940.3	976	984	8	981.667	2.33673
556	676904	7.75798e+06	1	1	0	0	91895.4	727	761	34	747.497	6.22304	low angle to fol
557	677370	7.75981e+06	1	1	0	0	316392	688	743	55	718.093	8.36124
558	704641	7.69927e+06	1	1	1	0	1.4867e+06	1277	1430	153	1375.92	34.6216
559	707828	7.69531e+06	1	1	1	0	1.68567e+06	1333	1467	134	1400.59	27.9405	poss >1 surface or paleovalley <100m relief
560	699281	7.69576e+06	1	1	1	1	75563	1296	1307	11	1301.39	2.23077
561	701836	7.69546e+06	1	1	1	0	1.59734e+06	1297	1542	245	1441.08	52.1454	rolling
562	704313	7.69075e+06	1	1	1	0	234582	1294	1368	74	1325.15	16.5151
563	706288	7.68823e+06	1	1	1	0	36484.2	1191	1244	53	1207.67	13.757
564	703722	7.68711e+06	1	1	1	1	102142	1160	1174	14	1168.07	3.85174
565	714760	7.70838e+06	1	1	0	0	1.0251e+06	1124	1208	84	1165.95	25.3329
566	714589	7.71563e+06	1	1	1	0	106895	1094	1160	66	1132.39	18.2015
567	715662	7.7356e+06	1	1	1	0	61819.5	1296	1343	47	1324.53	13.5341
568	723311	7.73388e+06	1	1	1	0	39406.5	1239	1253	14	1246.11	3.50944
569	723500	7.73451e+06	1	1	1	0	32929.1	1184	1211	27	1195.96	9.17765
570	721551	7.74001e+06	1	0	1	0	63228.2	1281	1305	24	1296.64	5.57187
571	725736	7.73633e+06	1	1	1	0	140349	1250	1284	34	1265.76	7.26328
572	728322	7.7373e+06	1	1	0	0	7042.46	1167	1181	14	1173	5.0272	low angle to fol
573	730819	7.73856e+06	1	1	0	0	206054	1172	1206	34	1194.4	7.785
574	729176	7.74286e+06	1	1	0	0	301958	1218	1299	81	1265.84	16.6121	low angle to fol
575	720779	7.73059e+06	1	1	1	0	512982	1197	1289	92	1243.15	19.3403
576	739553	7.73559e+06	2	0	1	1	705909	1053	1133	80	1088.67	18.6228
577	739456	7.73372e+06	2	0	1	1	943003	1038	1109	71	1076.91	15.2066
578	738309	7.72913e+06	1	1	1	1	239264	1082	1113	31	1099.31	4.58534
579	734451	7.73076e+06	2	0	0	2	1.41334e+06	879	980	101	937.584	23.6063
580	752278	7.73291e+06	2	1	0	1	1.65167e+06	986	1107	121	1043.38	24.9787
581	750613	7.74438e+06	2	1	1	0	344266	1153	1208	55	1189.5	12.2782
582	748601	7.7434e+06	2	1	1	0	254081	1008	1144	136	1075.48	32.0823
583	752413	7.7488e+06	1	1	1	0	585681	1240	1343	103	1297.67	28.0626
584	744931	7.74907e+06	1	1	0	0	317320	1195	1245	50	1218.3	8.13621
585	743766	7.74849e+06	1	1	0	0	19687.5	1202	1236	34	1219.97	10.2127
586	755324	7.74054e+06	2	1	1	0	1.24628e+06	1076	1295	219	1209.63	69.3169
587	769643	7.72867e+06	2	1	0	0	307923	1253	1324	71	1275.84	16.4086	low angle to fol
588	535131	7.6798e+06	1	1	0	0	955587	193	374	181	277.485	40.96	Andoya photo in Corner 2005 fig12.2
589	535397	7.68117e+06	1	1	0	0	672497	239	380	141	327.617	31.5517
590	535442	7.68281e+06	1	1	0	0	8654.25	325	331	6	328.2	1.6
591	537187	7.67676e+06	1	1	0	0	6178.33	480	483	3	482	0.894427
592	535940	7.67635e+06	2	1	0	1	68362.6	266	299	33	284.838	9.52998
593	521998	7.65854e+06	1	1	0	1	115937	329	379	50	354.514	13.643
594	524920	7.65613e+06	1	1	0	0	20116.5	522	546	24	534.371	6.00041
595	522864	7.66077e+06	1	1	0	1	36140.6	340	396	56	358.607	15.3735
596	523236	7.66464e+06	1	1	0	0	218826	349	412	63	387.441	15.1109	poss continuous with next
597	524033	7.66415e+06	1	1	0	0	169688	238	306	68	273.018	16.4835	possibly continuous with prev as tilted surface
598	524878	7.66674e+06	1	1	0	1	14279.3	225	246	21	234.545	6.06576	wider part of a long narrow ridge
599	532150	7.66179e+06	1	1	0	1	58934.9	321	342	21	334.304	4.5677	inset into next <100m
600	531586	7.66328e+06	2	1	0	1	30451.7	425	460	35	441.404	10.5562	poss tilted?
601	531468	7.66683e+06	1	1	0	1	553631	220	263	43	237.474	8.61235	poss inset into next <100m
602	531881	7.66581e+06	1	1	0	1	127744	257	281	24	270.068	5.6642
603	533757	7.66621e+06	1	1	0	0	360520	358	405	47	381.804	13.6602	highest of 4 surfaces in this area
604	534481	7.6655e+06	1	1	0	1	220223	265	338	73	297.605	18.2185	poss inset into prev
605	537135	7.67409e+06	1	1	0	1	69570	201	230	29	213.876	5.6461	inset into next
606	536218	7.67451e+06	1	1	0	0	29551.8	297	332	35	311.478	10.2209
607	537607	7.67799e+06	1	1	0	0	32903.3	334	352	18	342.377	4.34471	may be inset into 591 or sloping
608	538524	7.68054e+06	1	1	0	0	139723	297	347	50	326.686	12.1249
609	539285	7.68088e+06	1	1	0	0	86272.5	351	378	27	360.791	5.64855
610	538893	7.68339e+06	1	1	0	0	62658.3	370	397	27	379.79	5.84687
611	539845	7.68577e+06	1	1	0	1	17935.2	342	373	31	363.867	7.89402	poss inset into next, less tilt
612	539759	7.68698e+06	2	1	0	0	24123.6	352	400	48	375.132	12.8701	tilted?
613	540559	7.68606e+06	1	1	0	1	5190.85	250	262	12	255.111	4.60542	poss continuation of 611 downslope
614	529474	7.6584e+06	1	1	0	1	156387	340	399	59	379.713	12.6726
615	532346	7.65763e+06	2	1	0	2	428866	148	186	38	168.277	8.90676
616	797572	7.86374e+06	1	1	0	0	164233	404	467	63	446.587	19.4813	all surfaces low here?
617	798519	7.87389e+06	2	1	0	0	126427	417	456	39	440.536	9.25993
618	800121	7.87633e+06	2	1	0	2	522438	116	220	104	150.855	23.4663	saprolite loc but not v smooth
619	798094	7.85796e+06	2	1	0	0	399255	407	463	56	443.267	11.3588	very thin deps
620	797900	7.85894e+06	2	1	0	0	108508	436	456	20	445.893	3.99562	very thin deps poss inset into next
621	797582	7.85353e+06	1	1	0	0	194830	532	606	74	583.894	15.688
622	795821	7.85448e+06	1	1	0	0	58232.4	523	545	22	532.768	5.42403
623	790602	7.84728e+06	1	1	0	0	91324.5	607	649	42	627.168	12.1707
624	778626	7.84323e+06	1	1	1	0	316091	614	650	36	635.395	9.77712
625	775818	7.83944e+06	1	1	1	1	285446	338	432	94	404.026	24.6837	inset into ridgetop next
626	776243	7.84014e+06	1	1	1	0	36416.4	565	609	44	588.433	15.4298
627	772930	7.84051e+06	2	1	0	1	49328	514	546	32	527.443	9.53574	inset into prior?
628	772606	7.84005e+06	2	1	0	1	18476.7	458	478	20	467.833	5.67499	with prior
629	772274	7.83905e+06	2	1	0	1	35510.8	531	554	23	543.464	5.61555	with prior
630	770088	7.84275e+06	1	1	1	1	17137	467	475	8	471.346	1.99889
631	757778	7.85266e+06	1	1	0	4	620401	237	321	84	277.9	15.6532	poss strandflat
632	757097	7.85368e+06	1	1	0	2	51058.2	352	379	27	362.232	7.21499	with prior
633	757264	7.85437e+06	1	1	0	2	10327.6	314	321	7	318.2	2.10396	with prior
634	766008	7.85678e+06	1	1	0	4	385986	215	288	73	237.735	18.1798	prob strandflat
635	782894	7.86641e+06	1	1	0	1	65393.7	504	522	18	516.824	3.35777	low angle to fol ht poss 1
636	783725	7.86658e+06	1	1	0	0	165897	551	572	21	564.121	4.90596	low angle to fol ht poss 1
637	785099	7.86789e+06	1	1	0	1	58748.5	533	555	22	542.396	5.26836	low angle to fol ht poss 1
638	784723	7.8669e+06	1	1	0	1	52619.5	561	581	20	573.061	4.81194	low angle to fol ht poss 1
639	783654	7.86766e+06	2	1	0	0	126491	437	487	50	451.035	13.5038	low angle to fol ht poss 1
640	787081	7.86505e+06	1	1	0	1	190706	433	474	41	453.251	11.5497	rel ht?
641	789190	7.86376e+06	1	1	0	1	207097	429	489	60	455.91	16.2499	rel ht?
642	809132	7.8731e+06	1	1	0	4	574486	173	271	98	228.339	25.2517	prob strandflat
643	807465	7.87073e+06	2	1	0	1	466511	325	360	35	342.728	6.1319
644	849620	7.84813e+06	2	1	0	0	238280	620	656	36	643.873	7.3614	low angle to fol
645	807233	7.84762e+06	2	1	0	1	28337.9	519	529	10	525.814	3.11975	thin deps
646	807011	7.84739e+06	2	1	0	1	34302.3	545	568	23	560.327	4.59666	with prior
647	807749	7.84629e+06	2	1	0	1	81821.4	500	532	32	519.909	6.64974	with prior
648	804744	7.84061e+06	1	1	1	0	182278	693	735	42	711.042	10.1925	highest flat not highest topo
649	804986	7.83948e+06	2	1	0	0	104951	700	753	53	730.219	13.1633
650	804493	7.83888e+06	2	1	0	0	18131.2	675	691	16	682.467	3.87929
651	804275	7.83843e+06	2	1	0	0	24179.6	694	707	13	702.25	2.19943
652	803561	7.83779e+06	2	1	0	0	305248	724	777	53	749.453	10.282
653	802103	7.83518e+06	2	0	0	0	217285	989	1048	59	1019.79	15.7095	nearly highest pt, snow cover
654	800027	7.84128e+06	2	1	0	0	454919	729	881	152	810.897	40.2148	thin deps rolling
655	795502	7.83402e+06	2	1	0	0	215633	802	884	82	844.244	17.5358
656	794502	7.83459e+06	2	1	0	1	24946.3	744	769	25	757.372	7.65544
657	799054	7.82954e+06	2	1	0	0	142736	777	830	53	802.208	14.9701
658	799709	7.82964e+06	2	1	0	0	17290.4	816	824	8	819.533	1.78388
659	801289	7.82758e+06	2	1	0	1	27357.8	661	673	12	669.354	2.47057
660	790457	7.82432e+06	1	1	0	0	64489.4	683	709	26	697.651	5.4704	highest on this ridge
661	790469	7.82303e+06	1	1	0	1	43019.8	567	637	70	604.25	21.1855	inset into prev <100m
662	790390	7.82128e+06	1	1	0	1	12347.7	639	661	22	647.474	7.77559	with prev
663	787643	7.8222e+06	1	0	0	0	19749.1	947	955	8	951.581	2.53713	snow covered
664	784876	7.82593e+06	2	1	0	1	71567.7	520	627	107	578.948	30.4722	tilted or orig slope into vly
665	780400	7.8236e+06	2	1	0	0	41852.3	642	686	44	668.058	13.4766	low angle to fol, sloping
667	780700	7.82252e+06	2	1	1	0	37830.5	554	600	46	572.05	11.7437	with prev
668	796969	7.8144e+06	2	0	0	0	934679	646	708	62	690.191	12.4383	rolling, thin cover
669	791329	7.81703e+06	2	0	0	0	330457	862	916	54	894.413	12.919	snow covered, rolling, mostly bare rock
670	786934	7.81446e+06	2	1	0	1	101647	581	643	62	613.173	16.0234
671	871601	7.77906e+06	2	0	1	0	2.38214e+06	813	994	181	887.871	42.1601
672	876830	7.77858e+06	2	0	1	1	327854	705	850	145	751.758	39.0113
673	872193	7.79216e+06	2	0	1	1	2.59942e+06	718	842	124	767.837	30.8728
674	873517	7.78705e+06	2	0	1	1	736561	773	885	112	838.76	26.3926
675	868266	7.79274e+06	2	0	1	0	3.98983e+06	749	894	145	825.269	36.5385
676	876780	7.78371e+06	2	0	1	1	384689	737	821	84	781.541	16.8964
677	874477	7.77841e+06	2	0	1	1	77173.1	722	782	60	751.377	13.5842
678	896211	7.78917e+06	2	0	1	1	534982	684	745	61	716.035	15.8493
679	785127	7.80813e+06	1	0	0	1	553406	558	645	87	612.304	21.1085	thin cover, rolling, low ang to fol
680	789194	7.80737e+06	1	0	0	1	1.30857e+06	444	608	164	534.442	32.6535	thin cover, rolling, low ang to fol
681	786985	7.80572e+06	1	0	0	1	73355	643	674	31	659.286	6.58894	thin cover, rolling, low ang to fol
682	782073	7.80957e+06	1	0	0	1	79032.4	640	710	70	674.183	14.1693	thin cover, rolling, low ang to fol
683	780078	7.81003e+06	1	0	0	1	314517	669	770	101	732.063	21.846	thin cover, rolling, low ang to fol
684	780528	7.80724e+06	1	0	0	1	206654	668	700	32	684.754	6.59928	thin cover, rolling, low ang to fol
685	780838	7.80825e+06	1	0	0	1	251975	641	695	54	672.5	14.2139	thin cover, rolling, low ang to fol
686	790853	7.80106e+06	2	0	0	0	2.38084e+06	617	894	277	794.614	64.2295	with prev
687	792888	7.80029e+06	2	0	0	0	398514	791	864	73	828.862	17.935	with prev
689	795494	7.80189e+06	2	0	0	0	2.67675e+06	791	959	168	882.531	38.1666	with prev
690	797056	7.80272e+06	2	0	0	0	814910	729	892	163	842.367	34.9729	with prev
691	798524	7.8053e+06	2	0	0	1	990472	539	721	182	660.227	39.4155	with prev
692	788281	7.78828e+06	1	1	1	0	4.73273e+06	820	1089	269	967.228	59.1519	partly snow covered
693	785174	7.7843e+06	1	0	1	0	1.19933e+06	942	1122	180	1050.36	37.2471	partly snow covered
694	782577	7.78549e+06	1	0	1	0	922381	892	1003	111	951.677	27.6981
695	788117	7.7828e+06	1	0	1	0	2.80585e+06	873	997	124	950.152	24.7571	thin cover
696	787770	7.78585e+06	1	0	1	0	1.25318e+06	938	1052	114	1004.8	23.1599	snow covered
697	770414	7.81278e+06	1	1	1	1	319883	663	921	258	799.88	69.0412	poss par fol, sloping
698	772159	7.80872e+06	1	1	0	1	90071.9	794	885	91	845.789	22.8124	below ice cap
699	769687	7.8081e+06	1	1	0	1	77409.5	920	986	66	960.262	20.0151	below ice cap
700	763970	7.8122e+06	1	1	0	0	175975	979	1063	84	1026.03	20.5385	below ice cap
701	763507	7.81151e+06	1	1	0	0	20232.3	1011	1051	40	1032.42	12.3335	below ice cap
702	760777	7.81539e+06	2	1	0	2	233409	566	787	221	643.775	49.3715	poss valley side connected with next
703	760813	7.81671e+06	1	1	0	2	86077.7	386	462	76	413.359	13.6291
704	752166	7.81354e+06	2	1	0	3	2.97095e+06	405	625	220	515.234	38.1662	faulted or inset into mainland surfs?
705	749606	7.80761e+06	1	1	0	1	67233	549	618	69	577.802	18.8607	subparallel foliation?
706	749462	7.80725e+06	1	1	0	1	31290.4	635	651	16	642.941	4.17937	inset into prev
707	749938	7.80592e+06	1	1	0	2	403185	507	622	115	571.774	28.6092	subparallel foliation?
708	748089	7.80222e+06	1	0	0	0	200646	868	991	123	930.065	37.1364	snow covered
709	748104	7.80113e+06	1	0	0	0	129407	1019	1071	52	1055.01	13.8267
710	754749	7.80018e+06	1	0	1	0	231141	823	872	49	842.518	8.9567	below ice cap, snow covered
711	755232	7.7994e+06	1	0	1	0	30620	872	905	33	895.306	8.39632	below ice cap, snow covered
712	754673	7.79869e+06	1	0	1	0	36598.4	877	903	26	896.018	6.3513	below ice cap, snow covered
713	755036	7.7973e+06	1	0	1	0	99938.6	816	866	50	847.774	14.7236	below ice cap, snow covered
714	760574	7.79298e+06	1	1	1	0	230646	880	929	49	910.862	10.0866
715	760224	7.7938e+06	1	1	1	0	220101	787	847	60	818.513	14.7902
716	761106	7.79147e+06	1	1	1	0	78971.9	790	837	47	817.6	9.28569
717	740022	7.80451e+06	1	1	0	0	197738	812	887	75	844.672	16.8127
718	740156	7.80284e+06	1	1	0	0	21113.4	796	818	22	806.647	4.3783
719	740925	7.79709e+06	1	1	0	1	36752.4	706	726	20	718.368	4.10234
720	740174	7.7968e+06	1	1	0	1	81583.4	731	751	20	742.264	3.54925
721	751659	7.79769e+06	1	1	0	0	46916.2	870	903	33	881.726	7.76585
722	749803	7.79574e+06	2	0	1	1	70867.1	810	874	64	853.513	15.9026	inset into prev <100?
723	763687	7.78527e+06	2	1	0	0	944034	754	929	175	856.344	44.9322
724	759190	7.73865e+06	2	1	1	1	432405	1045	1136	91	1086.62	21.0981	steps here and next control by fol
725	757488	7.73954e+06	2	1	1	1	3.11913e+06	935	1181	246	1070.07	46.7562
726	715439	7.80081e+06	1	1	1	2	1.09458e+06	433	558	125	498.383	27.15
727	716829	7.79724e+06	1	1	1	0	1.11901e+06	841	1051	210	924.64	46.4703
728	711515	7.7994e+06	1	1	1	2	422126	495	600	105	569.316	19.8716
729	709687	7.78367e+06	1	1	1	2	103663	424	515	91	460.398	20.2793
730	712440	7.78194e+06	1	1	1	2	1.21444e+06	463	605	142	513.655	31.0954
731	715825	7.78303e+06	1	1	1	2	129074	413	476	63	436.282	11.9024
732	721325	7.79146e+06	1	1	1	1	945381	347	682	335	546.626	97.1263
733	722332	7.78541e+06	1	1	1	1	38656.5	754	768	14	762.746	2.79437
734	715370	7.75763e+06	2	1	1	0	1.30495e+06	855	1124	269	998.524	65.6638	dip controlled by fol, hangingwall of normal fault
735	717985	7.75664e+06	2	1	0	1	382346	815	943	128	889.809	32.3284
736	715646	7.7475e+06	2	1	1	0	606746	756	1128	372	944.136	86.1114	dip controlled by fol, hangingwall of normal fault
737	716796	7.74399e+06	2	1	1	0	214947	885	1273	388	1061.3	115.419	dip controlled by fol, hangingwall of normal fault
738	716937	7.74522e+06	2	1	1	0	96264.1	1112	1291	179	1247.45	42.7061	dip controlled by fol, hangingwall of normal fault
739	718753	7.73877e+06	2	1	1	0	58398.6	1192	1229	37	1215.04	10.1696	dip controlled by fol, hangingwall of normal fault
740	721081	7.73788e+06	2	1	1	1	21633.1	1192	1202	10	1198.63	2.55327	dip controlled by fol, hangingwall of normal fault
741	723321	7.73692e+06	2	1	1	1	178831	1031	1171	140	1107.91	37.1308	dip controlled by fol, hangingwall of normal fault
742	722343	7.71909e+06	2	1	1	0	2.84732e+06	1179	1332	153	1262.49	38.5472
743	726499	7.71781e+06	2	1	1	0	807600	1209	1323	114	1266.69	26.6142
744	722231	7.71521e+06	2	1	1	0	296032	1158	1222	64	1193.28	13.4367
745	724158	7.71778e+06	2	1	1	0	500708	1297	1374	77	1343.73	14.0753
746	726026	7.71694e+06	2	1	1	0	613853	1225	1357	132	1313.99	37.4646
747	728955	7.71583e+06	2	1	1	0	2.29081e+06	1028	1190	162	1091.03	31.3225
748	710096	7.68857e+06	2	1	1	0	274073	1323	1373	50	1352.38	7.06113
749	712016	7.68421e+06	2	1	1	0	125952	1314	1367	53	1342.04	13.5572
750	715380	7.6819e+06	2	1	1	0	828407	1251	1410	159	1351.69	39.751
751	713750	7.68088e+06	2	1	1	0	219198	1005	1152	147	1106.09	28.3582
752	717320	7.68504e+06	2	1	1	0	907596	1120	1321	201	1257.43	54.0028
753	718623	7.68732e+06	2	1	1	0	622705	1198	1318	120	1274.56	32.1155
754	719491	7.68542e+06	2	1	1	0	360944	1295	1381	86	1332.69	27.8521
755	719528	7.68415e+06	2	1	1	0	295924	1339	1407	68	1371.73	15.3067
756	703162	7.68494e+06	2	1	1	1	69717.1	1077	1160	83	1115.43	20.3157
757	701591	7.69185e+06	2	1	1	1	135283	1053	1169	116	1130.75	30.5235
758	525056	7.59994e+06	2	0	0	1	94536.5	590	677	87	640.088	21.6556	bench on side of cirque wall
759	547569	7.60481e+06	1	1	1	1	57711.8	714	776	62	753.494	13.1663
760	555729	7.60012e+06	1	1	0	1	143509	775	888	113	821.338	35.5007
761	532945	7.60008e+06	2	0	0	1	813953	502	761	259	607.39	61.1784	tilted?
762	534474	7.61103e+06	2	1	0	0	385073	609	732	123	661.518	27.2069	tilted?
763	511220	7.60556e+06	2	1	0	2	734482	314	385	71	355.035	15.0226	tilted? footwall?
764	511192	7.60375e+06	2	1	0	2	584195	363	481	118	421.836	29.4282	tilted? footwall?
765	513875	7.60813e+06	2	1	0	2	200744	402	622	220	502.783	53.104	tilted? footwall?
766	502638	7.4854e+06	2	1	0	0	17101.9	937	981	44	960.44	13.7814
767	493161	7.45143e+06	2	0	0	1	1.85695e+06	658	821	163	734.022	44.7656
769	488780	7.44103e+06	1	1	0	0	9668.47	1270	1286	16	1277.5	4.97494
770	488319	7.4406e+06	2	0	0	1	29292.2	1119	1126	7	1122.87	1.96279
771	515552	7.4951e+06	2	0	0	0	10454.8	743	747	4	744.562	0.998044	<100m below peak
772	525401	7.50748e+06	2	0	0	1	197561	699	837	138	761.468	48.0088
773	546241	7.48977e+06	2	0	0	2	146026	903	1006	103	940.515	35.1486	steps related to foliation? next 12
774	547701	7.48976e+06	2	0	1	1	37290.4	1080	1126	46	1109.53	12.6616
775	551391	7.4895e+06	2	0	1	1	1.32182e+06	972	1243	271	1102.14	67.4769
776	549264	7.48968e+06	2	0	1	0	39639.8	1302	1324	22	1312.85	7.06159
777	548370	7.49355e+06	2	0	1	2	511150	850	941	91	890.183	22.416
778	551010	7.49527e+06	2	0	1	2	154780	807	853	46	828.771	9.70073
779	549492	7.49548e+06	2	0	1	3	57375.8	721	764	43	741.067	10.8983
780	553183	7.49483e+06	2	0	1	1	139463	1023	1100	77	1051.75	18.4723
781	555386	7.49486e+06	2	0	1	0	428883	1154	1262	108	1224.37	25.9045
782	557913	7.49539e+06	2	0	1	0	383240	1200	1240	40	1221.99	7.04387
783	556741	7.49579e+06	2	0	1	1	60302.5	985	1014	29	997.412	5.60881
784	565926	7.50447e+06	2	0	1	0	26653.3	1098	1116	18	1106.03	5.14046
785	558832	7.50499e+06	2	0	1	0	504329	1059	1142	83	1098.19	19.6618
786	554043	7.50707e+06	2	0	0	0	257548	1123	1246	123	1179.2	37.7046
787	552365	7.5116e+06	2	0	0	1	24206.5	897	907	10	904.1	2.73679
788	555824	7.51045e+06	2	0	1	0	398543	1295	1441	146	1356.63	34.2014
789	568121	7.52013e+06	2	1	1	0	296470	1334	1366	32	1355.81	7.51899
790	542535	7.51412e+06	2	0	0	1	51215.4	880	926	46	902.59	12.463
791	541744	7.5128e+06	2	0	0	1	23948.6	840	902	62	868.3	21.0585
792	535531	7.51434e+06	2	0	0	0	170772	995	1070	75	1024.24	13.9057
793	536730	7.51801e+06	2	0	0	0	141196	999	1100	101	1046.86	21.099
794	568828	7.54346e+06	2	0	1	1	1.89284e+06	740	931	191	878.055	47.697
795	561857	7.53569e+06	2	0	1	2	436941	660	751	91	711.34	21.2405
797	580457	7.54165e+06	2	0	0	0	278268	1333	1378	45	1357.97	9.73951
798	583112	7.54107e+06	2	0	0	0	150160	1443	1451	8	1449.99	0.732885
799	587517	7.54954e+06	2	0	1	1	1.22009e+06	1078	1166	88	1125.36	18.2971
800	589859	7.55207e+06	2	0	1	1	709468	1109	1242	133	1208.2	26.543
801	587305	7.55093e+06	2	0	1	1	198567	1064	1125	61	1093.35	13.9838	inset <100m
802	591942	7.56139e+06	2	0	1	0	1.2489e+06	1333	1442	109	1396.84	24.7282	top is ice
803	595209	7.55902e+06	2	1	1	1	191463	1183	1253	70	1219.26	16.0269
804	614150	7.5597e+06	2	1	0	0	47981.2	1503	1646	143	1551.56	37.6018
805	619840	7.57709e+06	1	1	0	0	25262.1	1585	1603	18	1597.49	4.21153
806	620453	7.57781e+06	1	1	0	0	115515	1582	1682	100	1618.48	29.2802
807	654391	7.63783e+06	1	1	1	1	437389	1009	1127	118	1072.87	24.255	originally mapped as part of #87
808	668473	7.64065e+06	2	0	1	2	3.40987e+06	1016	1317	301	1182	51.1676	originally mapped as part of #96
809	667924	7.6392e+06	1	1	1	1	126058	1398	1455	57	1438.62	12.5693	originally mapped as part of #96
810	684684	7.66666e+06	1	1	0	0	153894	1517	1587	70	1548.28	16.4014	low angle to fol, 139 incised into it
811	506868	7.61418e+06	1	1	0	1	183370	302	396	94	345.116	21.9729	tilted into Sortlandsundet
812	506482	7.61486e+06	2	0	0	1	75913	382	429	47	404.172	10.7151	higher than prev by 40m, tilted
813	503676	7.61287e+06	1	1	0	2	96648.4	352	393	41	369.5	8.67923	tilted into Sortlandsundet
814	502438	7.61322e+06	2	0	0	1	155130	436	469	33	451.8	7.92598
815	508509	7.61511e+06	1	1	0	1	113169	402	440	38	420.747	8.62413	tilted into Sortlandsundet
816	508317	7.61684e+06	2	0	0	0	35100.3	584	642	58	614.576	13.6098	tilted into Sortlandsundet
817	508587	7.6162e+06	2	0	0	1	113337	434	470	36	448.753	8.66529	tilted into Sortlandsundet
818	510079	7.61627e+06	2	1	0	1	383821	310	429	119	372.52	32.7572
819	498792	7.61269e+06	2	1	0	1	637636	381	546	165	463.657	42.1963	thin deposits
820	501022	7.61227e+06	2	0	0	1	80125.6	426	459	33	444.744	6.21212
821	493919	7.61357e+06	2	1	0	2	320583	317	382	65	342.133	13.9804
822	666691	7.72959e+06	1	0	1	2	58044.5	711	758	47	729.936	10.2841	low angle to fol?
823	665425	7.72895e+06	2	1	1	1	57278.4	818	848	30	837.114	7.1802	low angle to fol?
824	680632	7.72682e+06	2	1	1	1	341649	949	1099	150	999.44	42.7205
825	680723	7.72997e+06	2	1	1	1	136019	1021	1104	83	1060.83	23.1394
826	661138	7.71726e+06	1	1	1	2	281251	858	887	29	868.862	7.07381
827	659682	7.71565e+06	1	1	1	1	45967.8	1001	1023	22	1012.03	5.14906
828	669525	7.70502e+06	2	1	1	0	84234.1	1034	1166	132	1105.31	33.0024	tilted, but parallel foliation
829	675901	7.71012e+06	1	1	1	1	56774.3	1079	1092	13	1086.4	3.68517
830	673522	7.70077e+06	2	1	1	1	71935.6	808	876	68	839.096	19.8693
831	675190	7.69901e+06	1	1	1	0	34818.6	1095	1126	31	1110.76	9.57221
832	683149	7.69723e+06	1	1	0	1	176560	1094	1147	53	1124.26	10.0873	inset into next by >100m
833	683571	7.69497e+06	1	1	0	0	20716.9	1323	1342	19	1333.81	5.61346
834	687286	7.69294e+06	1	1	1	0	129104	1357	1492	135	1435.64	39.1751
835	687216	7.69204e+06	1	1	1	1	18566.3	1316	1334	18	1325.23	3.98958	inset into pror
836	688443	7.69597e+06	1	1	1	0	24722.3	1478	1507	29	1496.62	6.701	highest in area
837	682659	7.69786e+06	2	1	1	1	41111.2	922	1010	88	966.821	22.181
838	692456	7.70389e+06	1	1	1	0	207130	1407	1491	84	1446.84	21.7715	tilted but parallel fol
839	689207	7.70442e+06	2	1	0	0	334846	1424	1506	82	1465.11	20.7383	rolling, glacier covered
840	695958	7.71003e+06	2	1	1	0	93213.1	1343	1406	63	1362.12	11.8172	possibly connected to or inset into 524
841	699500	7.71029e+06	2	1	1	2	45238.8	974	985	11	979.918	2.82723
842	692897	7.70996e+06	2	1	1	0	103891	1305	1401	96	1362.15	25.8812
843	697978	7.71711e+06	1	1	1	1	616013	1284	1407	123	1335.75	33.2103
844	689731	7.71183e+06	2	1	1	0	47921.2	1540	1643	103	1604.95	30.9332	below ice cap
845	687935	7.71414e+06	2	1	1	0	28747.4	1520	1665	145	1576.49	49.6811	edge of ice cap
846	692063	7.71737e+06	2	1	0	0	288783	1613	1682	69	1648.18	19.0874	edge of ice cap
847	692580	7.7161e+06	2	1	1	0	56465.7	1702	1745	43	1729.81	9.85613	under ice
848	688354	7.72021e+06	1	1	1	0	16916.2	1559	1585	26	1569.38	9.64396
849	689123	7.72131e+06	1	1	0	0	7638.72	1560	1567	7	1563.75	2.0052
850	703630	7.70216e+06	1	1	1	1	1.23283e+06	1068	1178	110	1125.4	21.633
851	703242	7.69928e+06	2	1	1	1	465041	1222	1328	106	1280.55	20.3193	poss a lower level than previous, eroded foliation
852	702057	7.70017e+06	1	1	1	0	333067	1245	1349	104	1300.07	27.6183
853	706043	7.69745e+06	2	1	1	0	534644	1302	1403	101	1357.65	20.7724
854	707867	7.69884e+06	1	1	1	1	54038.8	1173	1254	81	1220.8	15.9495	<100m down from 856
855	708183	7.69678e+06	2	1	1	1	248110	1274	1435	161	1332.56	38.4022	irregularly eroded across fol-stepped down
856	708350	7.69782e+06	2	1	1	1	54659.6	1207	1250	43	1228.36	11.1333	irregularly eroded across fol-<100m from prev
857	713475	7.71006e+06	2	1	1	0	340390	1037	1212	175	1152.79	56.0907
858	712813	7.71139e+06	2	1	1	0	513050	1147	1194	47	1172.13	10.1125
859	711626	7.71299e+06	2	1	1	0	655019	1013	1116	103	1086.82	21.7469
860	712574	7.71502e+06	2	1	1	0	329547	1043	1100	57	1073.52	13.705
861	712459	7.71649e+06	2	1	1	0	542798	1111	1145	34	1129.39	6.9642
862	723056	7.71367e+06	2	1	1	1	167077	1213	1282	69	1248.77	18.5332
863	723882	7.7306e+06	2	1	1	0	404569	1182	1278	96	1240.73	23.4264
864	727353	7.73085e+06	2	1	1	0	839415	1212	1284	72	1246.24	17.5046
865	727399	7.72992e+06	2	1	1	0	198577	1183	1217	34	1200.04	5.59661
866	728326	7.7286e+06	2	1	1	0	120777	1242	1271	29	1259.98	6.88344
867	727709	7.73321e+06	2	1	1	0	158798	1194	1240	46	1225.05	10.0001
868	870078	7.77836e+06	2	0	1	0	484180	926	1023	97	980.539	16.3889
869	872221	7.78161e+06	2	0	1	0	159358	1081	1116	35	1100.06	7.64561
870	872960	7.7845e+06	2	0	1	0	550841	987	1063	76	1027.71	17.9215
871	867296	7.77451e+06	2	0	1	0	150000	928	1020	92	973.395	27.2891
872	864132	7.79052e+06	2	0	1	0	74552.1	1115	1136	21	1126.34	5.22584
873	829962	7.77705e+06	3	0	1	2	4.40573e+06	365	448	83	404.678	19.5573	uncertain rel ht, but a min ht
874	829010	7.77362e+06	3	0	1	2	9.26373e+06	340	449	109	385.618	26.0272	same as above
875	838245	7.765e+06	3	0	1	2	4.8393e+06	418	481	63	450.076	11.0373	same
876	828768	7.78198e+06	3	0	1	2	1.57509e+06	460	557	97	491.872	23.4835	not sure of rel ht but lower than sides of valley
877	711704	7.79899e+06	1	1	1	1	68116.3	601	655	54	636.459	11.8519
878	716028	7.78598e+06	1	1	1	1	22383.6	756	764	8	761.371	1.86832
879	809593	7.84094e+06	2	0	1	0	225562	709	752	43	732.474	8.75757
880	797008	7.83297e+06	2	1	0	0	90320	839	860	21	849.438	5.50339
881	746665	7.7498e+06	1	1	0	0	304930	1223	1267	44	1251.4	9.85883
882	747092	7.74671e+06	2	1	0	0	1.28681e+06	1119	1236	117	1177.71	32.9283
883	750122	7.74922e+06	1	0	0	0	1.11319e+06	1180	1228	48	1205.22	9.55697	partly glacier covered
884	749091	7.75025e+06	2	1	0	0	73948.5	1182	1216	34	1198.85	6.33171
885	765216	7.7303e+06	2	1	1	0	169768	1163	1201	38	1178.09	11.4021
886	691769	7.72206e+06	1	0	0	0	16075.3	1457	1473	16	1465.5	4.19936
887	688668	7.71959e+06	1	1	1	0	28288.6	1666	1685	19	1680.42	4.38932
888	698207	7.70735e+06	2	0	1	3	2.66571e+06	482	577	95	534.946	16.7373	bench
889	694483	7.7028e+06	2	0	0	3	4.34916e+06	582	793	211	672.998	43.0684	bench
890	699686	7.68532e+06	1	1	1	0	17561.3	1519	1531	12	1526.37	3.78249
891	700796	7.68433e+06	1	1	1	1	91351	1308	1337	29	1326.64	6.87591	ht 0 or 1?
892	679094	7.67423e+06	1	0	0	0	12012.9	1480	1492	12	1485.47	3.69022
893	690702	7.71435e+06	1	0	0	0	222680	1763	1832	69	1811.75	14.9348	ice covered Jiehkkevarri
894	754295	7.79041e+06	2	0	0	0	184224	1021	1097	76	1058.62	18.5279	ice covered
895	761605	7.79665e+06	2	0	0	0	56851.7	1010	1029	19	1020.51	4.32168
896	695861	7.80562e+06	2	0	0	2	1.6714e+06	299	421	122	345.736	29.0085
897	671603	7.79782e+06	1	1	0	0	36068.6	540	543	3	541.203	0.878744
898	604230	7.7042e+06	2	0	0	0	81174	537	624	87	580.392	22.6551	ridge
899	671468	7.62791e+06	2	1	1	0	885284	1184	1325	141	1251.27	33.29	low angle to fol
900	677726	7.61013e+06	1	1	0	0	17561.3	1637	1647	10	1641.71	2.76273
901	686911	7.61639e+06	2	0	0	0	86521.2	1563	1631	68	1611.57	16.3157
902	660057	7.61585e+06	1	1	0	1	36350.9	1305	1335	30	1322.05	8.59133
903	637289	7.61737e+06	1	1	1	0	203529	1372	1408	36	1399.77	7.22194
904	530282	7.66318e+06	2	0	0	0	35448.7	525	572	47	543.877	11.5805	ridge
905	500481	7.61642e+06	2	1	0	0	61863.9	577	626	49	589.363	12.3215
906	507752	7.63651e+06	2	1	0	0	10353.7	740	759	19	748.333	5.60753
907	596892	7.58306e+06	1	1	0	0	7273.49	1541	1573	32	1558.73	11.6782
908	603239	7.57451e+06	1	1	0	0	158569	1347	1436	89	1412.07	11.1083	subpar fol
909	604068	7.57747e+06	1	1	0	1	99897.2	1365	1395	30	1381.75	5.39643	fol step down from 480
910	627124	7.57446e+06	2	1	1	0	160852	1281	1384	103	1340.97	34.7823
911	591012	7.55317e+06	2	0	1	0	206388	1276	1319	43	1296.76	9.24301
912	588886	7.55661e+06	2	0	1	0	34606.5	1298	1321	23	1305.79	6.81722
913	573530	7.54424e+06	2	0	0	0	16586.4	1300	1322	22	1315.44	6.30305
915	548058	7.51331e+06	2	1	1	0	590255	1036	1126	90	1084.72	28.6164
916	558549	7.50569e+06	2	0	1	0	208432	1105	1140	35	1124.27	7.52808
917	560935	7.50057e+06	2	0	1	0	172137	985	1021	36	1000.31	6.13815
918	570006	7.53171e+06	2	0	1	0	104979	1162	1188	26	1179.19	5.65164
919	531505	7.46642e+06	2	0	1	0	59445.3	1118	1140	22	1128.44	5.77497
920	604463	7.72036e+06	1	1	0	0	13517	557	583	26	570.85	8.82199	ridge
921	697717	7.67088e+06	1	1	1	0	106511	1364	1445	81	1406.06	21.9332
NOTES:
* XCoord, YCoord are given in metres in UTM Zone 33 coordinates
**Quality 1 is highest, 3 is lowest, rated on basis of evidence for preservation of a relict landform in airphotos: smooth, flat, little evidence of fluvial or glacial erosion
† Deposits 0=none, 1=presence of thick weathering deposit (e.g. blockfield, saprolite)
ß Folparallel 0=no 1=yes, from oblique images in Norgei3d and field observation
ø Relheight: 0 is highest, 4 is lowest in a given area surrounded by major drainages. 4 indicates lowest elevation surfaces are likely part of the strandflat, although this surface was not mapped throughout the study area.
6 indicates surfaces with a change in elevation, either a smooth depression suggesting a paleovalley, or a sharp step of <100m relief suggesting that two surfaces may be preserved.
Remaining numerical columns are calculated by ArcGIS.
Comments abbreviations: correl-correlative; cts-continous; equiv-equivalent; fol-foliation;ht-height; lvl-level; poss-possible;topo-topography
